# Supplementary material for: Cross-country health inequalities of four common nutritional deficiencies among children, 1990 to 2019: data from the Global Burden of Disease Study 2019
Source: Springer Nature journal article supplement (doi:10.1186/s12889-024-17942-y), 2024-02-15
Supplement: MOESM1 [file 26739446]

## **Additional files**

**Additional File 1:** Overview of Global Burden of Disease Study

**Additional File 2:** Socio-demographic index of all countries/territories in 2019

**Additional File 3:** Supplementary figures

**Figure S1** Global age-standardized prevalence rates of protein-energy malnutrition, dietary iron deficiency, vitamin A deficiency and iodine deficiency in males and females, 1990 to 2019

**Figure S2** Temporal change in the relative proportion of four nutritional deficiencies prevalence cases across age groups, 1990 to 2019.

**Figure S3** The age-standardized prevalence and DALY rates of protein-energy malnutrition by sex in 21 GBD regions, 2019

**Figure S4** Global age-standardized DALY rates of protein-energy malnutrition, dietary iron deficiency, vitamin A deficiency and iodine deficiency in males and females, 1990 to 2019

**Figure S5** The age-standardized prevalence and DALY rates of dietary iron deficiency by sex in 21 GBD regions, 2019.

**Figure S6** The age-standardized prevalence and DALY rates of vitamin A deficiency by sex in 21 GBD regions, 2019.

**Figure S7** The age-standardized prevalence and DALY rates of iodine deficiency by sex in 21 GBD regions, 2019.

**Figure S8** The age-standardized prevalence rates of protein-energy malnutrition, dietary iron deficiency, vitamin A deficiency and iodine deficiency in different SDI quintiles, 1990 to 2019

**Figure S9** The age-standardized DALY rates of protein-energy malnutrition, dietary iron deficiency, vitamin A deficiency and iodine deficiency in different SDI quintiles, 1990 to 2019

**Figure S10** The relationships between age-standardized DALY rates of four nutritional deficiencies and SDI across all countries/territories in 2019.

**Figure S11** The relationships between age-standardized DALY rates of four nutritional deficiencies and HAQ across all countries/territories in 2019.

**Figure S12** The age-standardized prevalence rates of protein-energy malnutrition, dietary iron deficiency, vitamin A deficiency and iodine deficiency for 21 GBD regions by socio-demographic index, 1990 to 2019

**Figure S13** The age-standardized DALY rates of protein-energy malnutrition, dietary iron deficiency, vitamin A deficiency and iodine deficiency for 21 GBD regions by socio-demographic index, 1990 to 2019

**Additional File 4:** Supplementary tables

**Table S1** Count and rates of protein-energy malnutrition, dietary iron deficiency, vitamin A deficiency and iodine deficiency prevalence in 21 GBD regions in 2019

**Table S2** Count and rates of protein-energy malnutrition, dietary iron deficiency, vitamin A deficiency and iodine deficiency DALY in 21 GBD regions in 2019

## **Additional File 1: Overview of Global Burden of Disease Study**

### **1. Overview**

The Global Burden of Diseases Study (GBD) provides a systematic scientific assessment of published, publicly available, and contributed data on disease and injury incidence, prevalence, and mortality of diseases and injuries. It produced estimates for 204 countries and territories that were grouped into 21 GBD regions and seven super-regions [1].

### **2. Data**

The GBD estimation process is based on identifying multiple relevant data sources for each disease or injury including censuses, household surveys, civil registration and vital statistics, disease registries, health service use, air pollution monitors, satellite imaging, disease notifications, and other sources [1]. For some diseases and injuries, processed data are modelled using standardized tools to generate estimates of each quantity of interest by age, sex, location, and year. DisMod-MR is a Bayesian meta-regression tool that allows evaluation of all available data on incidence, prevalence, remission, and mortality for a disease, enforcing consistency between epidemiological parameters [1]. The metric definitions are listed as follows

|                                        | Number                                  | Rate                               |
|----------------------------------------|-----------------------------------------|------------------------------------|
| Prevalence                             | Total number of cases in the population | Total cases per 100,000 population |
| Disability adjusted life years (DALYs) | Number of DALYs in the population       | DALYs per 100,000 population       |

### **3. Data selecting**

The GBD 2019 cause list is organized into a hierarchy (four levels). Level 1 contains 3 groups, named communicable, maternal, neonatal and nutritional diseases,

noncommunicable diseases and injuries. In this study, the broad group “Nutritional deficiencies is at Level 2 under the Level 1 group “Communicable, maternal, neonatal and nutritional diseases”. GBD 2019 classified all nutritional deficiencies into five types according to the International Statistical Classification of Diseases and Related Health Problems, Tenth Revision. In this study, we selected the disease named “Iodine deficiency”, “Vitamin A deficiency”, “Dietary iron deficiency”, and “Protein-energy malnutrition”, which coded E40-E46.9, E64.0, D50-D50.9, E50-E50.9, E64.1, and E00-E02.

#### Reference

[1] GBD 2019 Diseases and Injuries Collaborators. Global burden of 369 diseases and injuries in 204 countries and territories, 1990-2019: a systematic analysis for the Global Burden of Disease Study 2019. *Lancet*. 2020; 396(10258): 1204-1222.

**Additional File 2: Socio-demographic index of all countries/territories in 2019**

| Location                         | Year | SDI   |
|----------------------------------|------|-------|
| Afghanistan                      | 2019 | 0.343 |
| Albania                          | 2019 | 0.681 |
| Algeria                          | 2019 | 0.652 |
| American Samoa                   | 2019 | 0.712 |
| Andorra                          | 2019 | 0.894 |
| Angola                           | 2019 | 0.47  |
| Antigua and Barbuda              | 2019 | 0.743 |
| Argentina                        | 2019 | 0.708 |
| Armenia                          | 2019 | 0.689 |
| Australia                        | 2019 | 0.839 |
| Austria                          | 2019 | 0.849 |
| Azerbaijan                       | 2019 | 0.683 |
| Bahamas                          | 2019 | 0.796 |
| Bahrain                          | 2019 | 0.751 |
| Bangladesh                       | 2019 | 0.483 |
| Barbados                         | 2019 | 0.742 |
| Belarus                          | 2019 | 0.745 |
| Belgium                          | 2019 | 0.851 |
| Belize                           | 2019 | 0.603 |
| Benin                            | 2019 | 0.352 |
| Bermuda                          | 2019 | 0.813 |
| Bhutan                           | 2019 | 0.455 |
| Bolivia (Plurinational State of) | 2019 | 0.566 |
| Bosnia and Herzegovina           | 2019 | 0.718 |
| Botswana                         | 2019 | 0.634 |
| Brazil                           | 2019 | 0.64  |
| Brunei Darussalam                | 2019 | 0.823 |
| Bulgaria                         | 2019 | 0.764 |
| Burkina Faso                     | 2019 | 0.257 |
| Burundi                          | 2019 | 0.284 |
| Cabo Verde                       | 2019 | 0.525 |
| Cambodia                         | 2019 | 0.469 |
| Cameroon                         | 2019 | 0.49  |
| Canada                           | 2019 | 0.873 |
| Central African Republic         | 2019 | 0.274 |

---

|                                       |      |       |
|---------------------------------------|------|-------|
| Chad                                  | 2019 | 0.238 |
| Chile                                 | 2019 | 0.759 |
| China                                 | 2019 | 0.686 |
| Colombia                              | 2019 | 0.633 |
| Comoros                               | 2019 | 0.455 |
| Congo                                 | 2019 | 0.568 |
| Cook Islands                          | 2019 | 0.764 |
| Costa Rica                            | 2019 | 0.68  |
| Côte d'Ivoire                         | 2019 | 0.408 |
| Croatia                               | 2019 | 0.794 |
| Cuba                                  | 2019 | 0.668 |
| Cyprus                                | 2019 | 0.841 |
| Czechia                               | 2019 | 0.828 |
| Democratic People's Republic of Korea | 2019 | 0.558 |
| Democratic Republic of the Congo      | 2019 | 0.382 |
| Denmark                               | 2019 | 0.89  |
| Djibouti                              | 2019 | 0.459 |
| Dominica                              | 2019 | 0.729 |
| Dominican Republic                    | 2019 | 0.592 |
| Ecuador                               | 2019 | 0.64  |
| Egypt                                 | 2019 | 0.658 |
| El Salvador                           | 2019 | 0.573 |
| Equatorial Guinea                     | 2019 | 0.685 |
| Eritrea                               | 2019 | 0.396 |
| Estonia                               | 2019 | 0.835 |
| Eswatini                              | 2019 | 0.577 |
| Ethiopia                              | 2019 | 0.343 |
| Fiji                                  | 2019 | 0.664 |
| Finland                               | 2019 | 0.856 |
| France                                | 2019 | 0.834 |
| Gabon                                 | 2019 | 0.656 |
| Gambia                                | 2019 | 0.399 |
| Georgia                               | 2019 | 0.702 |
| Germany                               | 2019 | 0.898 |
| Ghana                                 | 2019 | 0.557 |
| Greece                                | 2019 | 0.794 |
| Greenland                             | 2019 | 0.761 |

---

---

|                                  |      |       |
|----------------------------------|------|-------|
| Grenada                          | 2019 | 0.669 |
| Guam                             | 2019 | 0.813 |
| Guatemala                        | 2019 | 0.526 |
| Guinea-Bissau                    | 2019 | 0.355 |
| Guinea                           | 2019 | 0.325 |
| Guyana                           | 2019 | 0.618 |
| Haiti                            | 2019 | 0.432 |
| Honduras                         | 2019 | 0.496 |
| Hungary                          | 2019 | 0.791 |
| Iceland                          | 2019 | 0.869 |
| India                            | 2019 | 0.566 |
| Indonesia                        | 2019 | 0.66  |
| Iran (Islamic Republic of)       | 2019 | 0.67  |
| Iraq                             | 2019 | 0.671 |
| Ireland                          | 2019 | 0.867 |
| Israel                           | 2019 | 0.803 |
| Italy                            | 2019 | 0.801 |
| Jamaica                          | 2019 | 0.684 |
| Japan                            | 2019 | 0.87  |
| Jordan                           | 2019 | 0.731 |
| Kazakhstan                       | 2019 | 0.723 |
| Kenya                            | 2019 | 0.508 |
| Kiribati                         | 2019 | 0.527 |
| Kuwait                           | 2019 | 0.851 |
| Kyrgyzstan                       | 2019 | 0.596 |
| Lao People's Democratic Republic | 2019 | 0.49  |
| Latvia                           | 2019 | 0.82  |
| Lebanon                          | 2019 | 0.708 |
| Lesotho                          | 2019 | 0.507 |
| Liberia                          | 2019 | 0.37  |
| Libya                            | 2019 | 0.709 |
| Lithuania                        | 2019 | 0.843 |
| Luxembourg                       | 2019 | 0.895 |
| Madagascar                       | 2019 | 0.396 |
| Malawi                           | 2019 | 0.384 |
| Malaysia                         | 2019 | 0.737 |
| Maldives                         | 2019 | 0.562 |
| Mali                             | 2019 | 0.263 |

---

---

|                                  |      |       |
|----------------------------------|------|-------|
| Malta                            | 2019 | 0.801 |
| Marshall Islands                 | 2019 | 0.544 |
| Mauritania                       | 2019 | 0.496 |
| Mauritius                        | 2019 | 0.705 |
| Mexico                           | 2019 | 0.649 |
| Micronesia (Federated States of) | 2019 | 0.58  |
| Monaco                           | 2019 | 0.902 |
| Mongolia                         | 2019 | 0.606 |
| Montenegro                       | 2019 | 0.791 |
| Morocco                          | 2019 | 0.548 |
| Mozambique                       | 2019 | 0.307 |
| Myanmar                          | 2019 | 0.521 |
| Namibia                          | 2019 | 0.612 |
| Nauru                            | 2019 | 0.618 |
| Nepal                            | 2019 | 0.422 |
| Netherlands                      | 2019 | 0.883 |
| New Zealand                      | 2019 | 0.84  |
| Nicaragua                        | 2019 | 0.517 |
| Niger                            | 2019 | 0.162 |
| Nigeria                          | 2019 | 0.515 |
| Niue                             | 2019 | 0.711 |
| North Macedonia                  | 2019 | 0.744 |
| Northern Mariana Islands         | 2019 | 0.771 |
| Norway                           | 2019 | 0.913 |
| Oman                             | 2019 | 0.783 |
| Pakistan                         | 2019 | 0.449 |
| Palau                            | 2019 | 0.738 |
| Palestine                        | 2019 | 0.588 |
| Panama                           | 2019 | 0.686 |
| Papua New Guinea                 | 2019 | 0.394 |
| Paraguay                         | 2019 | 0.638 |
| Peru                             | 2019 | 0.648 |
| Philippines                      | 2019 | 0.623 |
| Poland                           | 2019 | 0.802 |
| Portugal                         | 2019 | 0.743 |
| Puerto Rico                      | 2019 | 0.814 |
| Qatar                            | 2019 | 0.83  |
| Republic of Korea                | 2019 | 0.878 |

---



---

|                                  |      |       |
|----------------------------------|------|-------|
| Republic of Moldova              | 2019 | 0.696 |
| Romania                          | 2019 | 0.76  |
| Russian Federation               | 2019 | 0.805 |
| Rwanda                           | 2019 | 0.429 |
| Saint Kitts and Nevis            | 2019 | 0.746 |
| Saint Lucia                      | 2019 | 0.67  |
| Saint Vincent and the Grenadines | 2019 | 0.627 |
| Samoa                            | 2019 | 0.641 |
| San Marino                       | 2019 | 0.884 |
| Sao Tome and Principe            | 2019 | 0.502 |
| Saudi Arabia                     | 2019 | 0.805 |
| Senegal                          | 2019 | 0.389 |
| Serbia                           | 2019 | 0.767 |
| Seychelles                       | 2019 | 0.724 |
| Sierra Leone                     | 2019 | 0.347 |
| Singapore                        | 2019 | 0.861 |
| Slovakia                         | 2019 | 0.812 |
| Slovenia                         | 2019 | 0.84  |
| Solomon Islands                  | 2019 | 0.407 |
| Somalia                          | 2019 | 0.081 |
| South Africa                     | 2019 | 0.678 |
| South Sudan                      | 2019 | 0.363 |
| Spain                            | 2019 | 0.767 |
| Sri Lanka                        | 2019 | 0.69  |
| Sudan                            | 2019 | 0.515 |
| Suriname                         | 2019 | 0.636 |
| Sweden                           | 2019 | 0.872 |
| Switzerland                      | 2019 | 0.929 |
| Syrian Arab Republic             | 2019 | 0.619 |
| Tajikistan                       | 2019 | 0.539 |
| Thailand                         | 2019 | 0.687 |
| Timor-Leste                      | 2019 | 0.514 |
| Togo                             | 2019 | 0.417 |
| Tokelau                          | 2019 | 0.626 |
| Tonga                            | 2019 | 0.636 |
| Trinidad and Tobago              | 2019 | 0.757 |
| Tunisia                          | 2019 | 0.672 |
| Turkey                           | 2019 | 0.748 |

---

---

|                                    |      |       |
|------------------------------------|------|-------|
| Turkmenistan                       | 2019 | 0.67  |
| Tuvalu                             | 2019 | 0.589 |
| Uganda                             | 2019 | 0.404 |
| Ukraine                            | 2019 | 0.736 |
| United Arab Emirates               | 2019 | 0.88  |
| United Kingdom                     | 2019 | 0.847 |
| United Republic of Tanzania        | 2019 | 0.423 |
| United States of America           | 2019 | 0.859 |
| United States Virgin Islands       | 2019 | 0.799 |
| Uruguay                            | 2019 | 0.697 |
| Uzbekistan                         | 2019 | 0.631 |
| Vanuatu                            | 2019 | 0.485 |
| Venezuela (Bolivarian Republic of) | 2019 | 0.607 |
| Viet Nam                           | 2019 | 0.617 |
| Yemen                              | 2019 | 0.412 |
| Zambia                             | 2019 | 0.505 |
| Zimbabwe                           | 2019 | 0.476 |

---

SDI: socio-demographic index

### Additional File 3: Supplementary figures

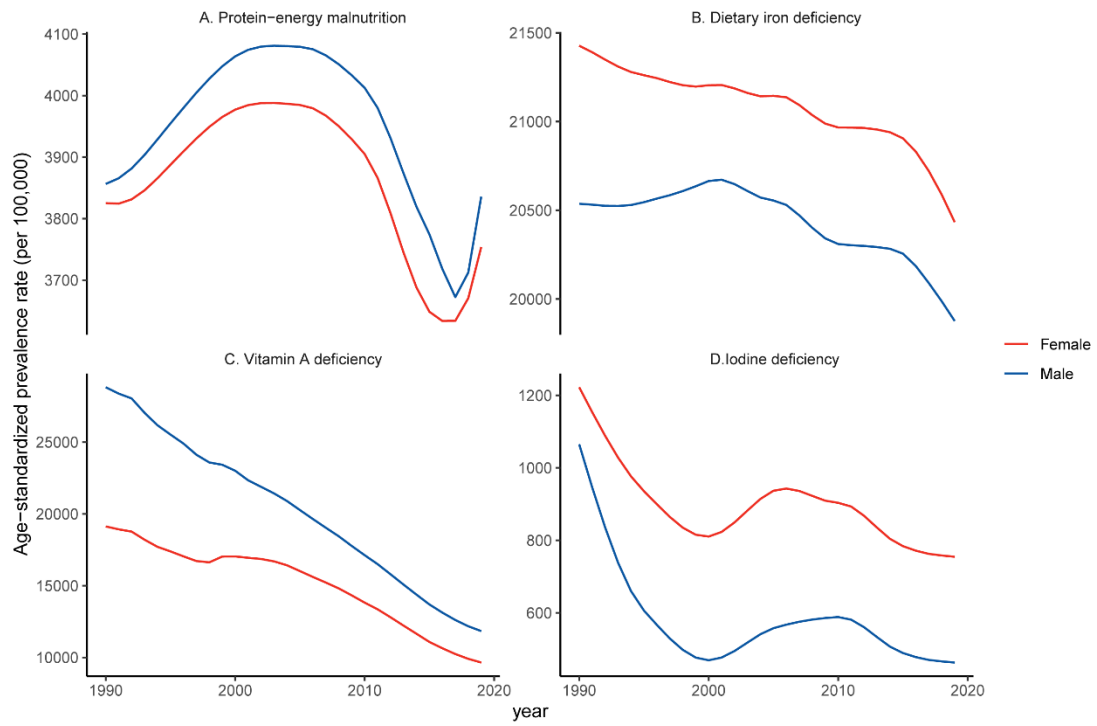

**Figure S1** Global age-standardized prevalence rates of protein-energy malnutrition, dietary iron deficiency, vitamin A deficiency and iodine deficiency in males and females, 1990 to 2019

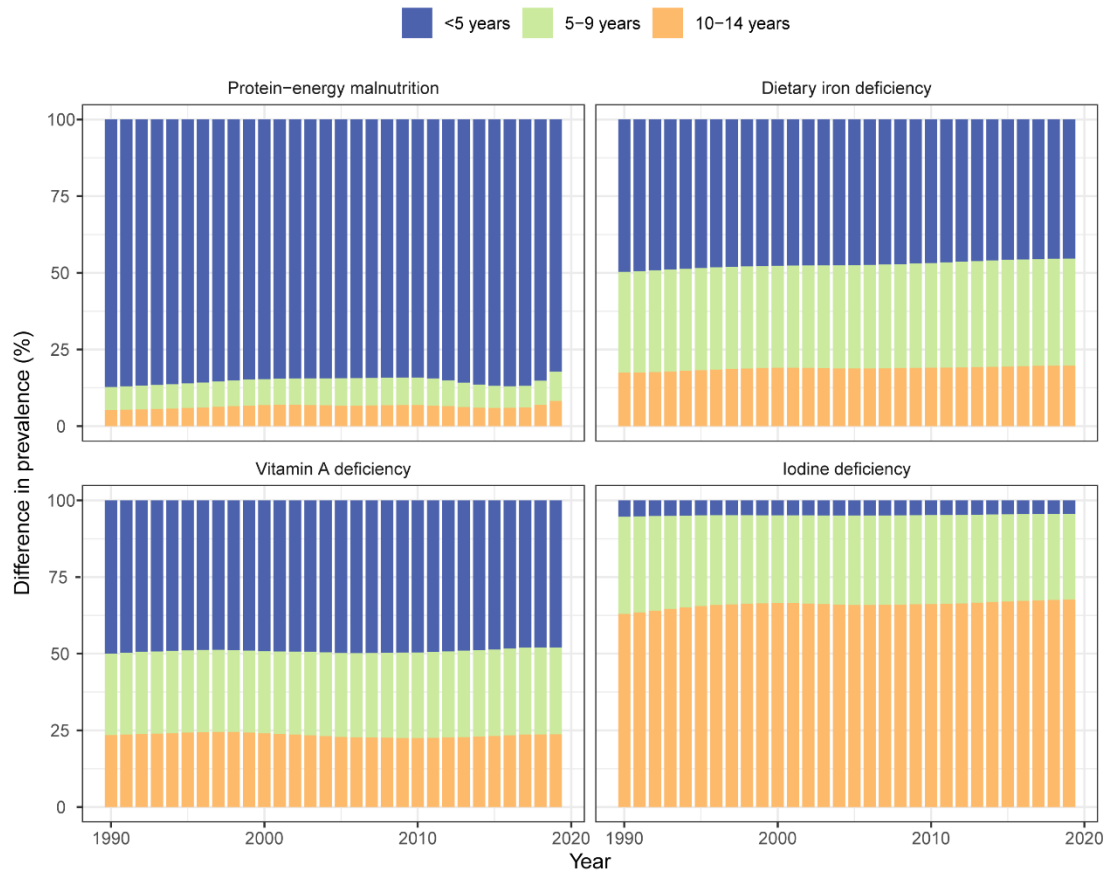

**Figure S2** Temporal change in the relative proportion of four nutritional deficiencies prevalence cases across age groups, 1990 to 2019.

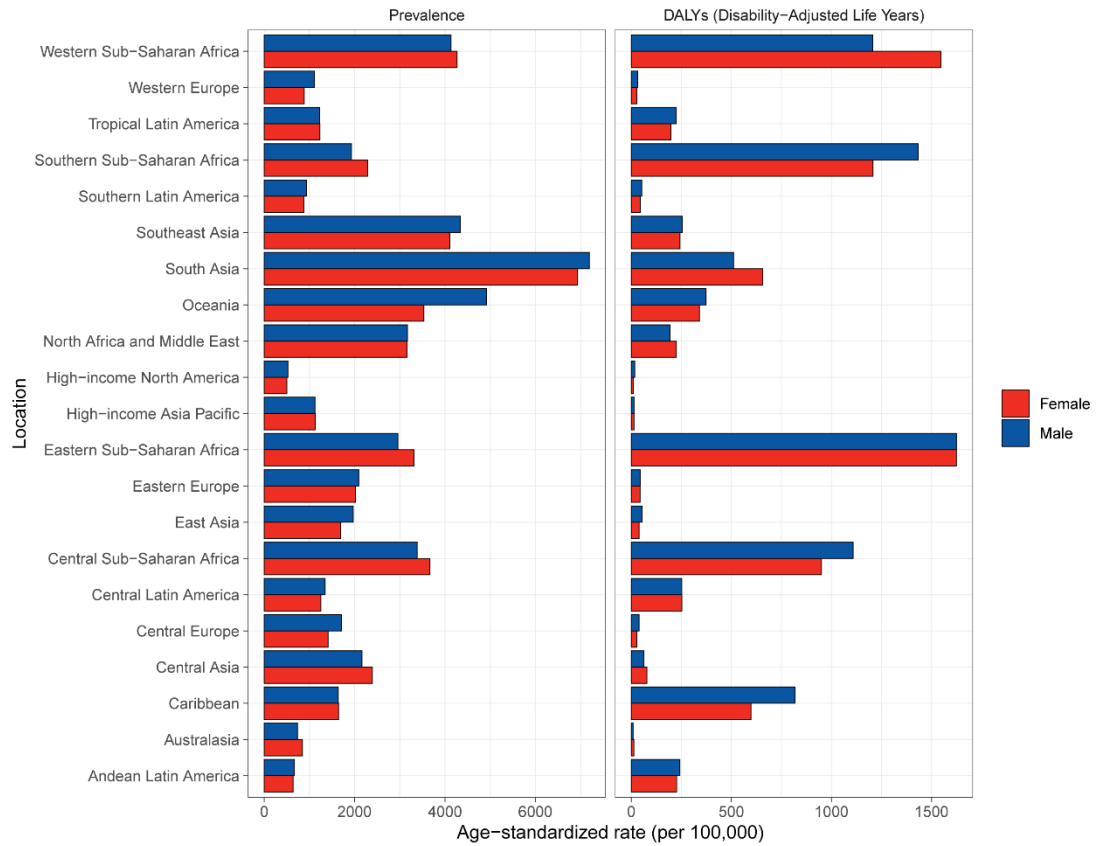

**Figure S3** The age-standardized prevalence and DALY rates of protein-energy malnutrition by sex in 21 GBD regions, 2019. DALY: disability-adjusted life year

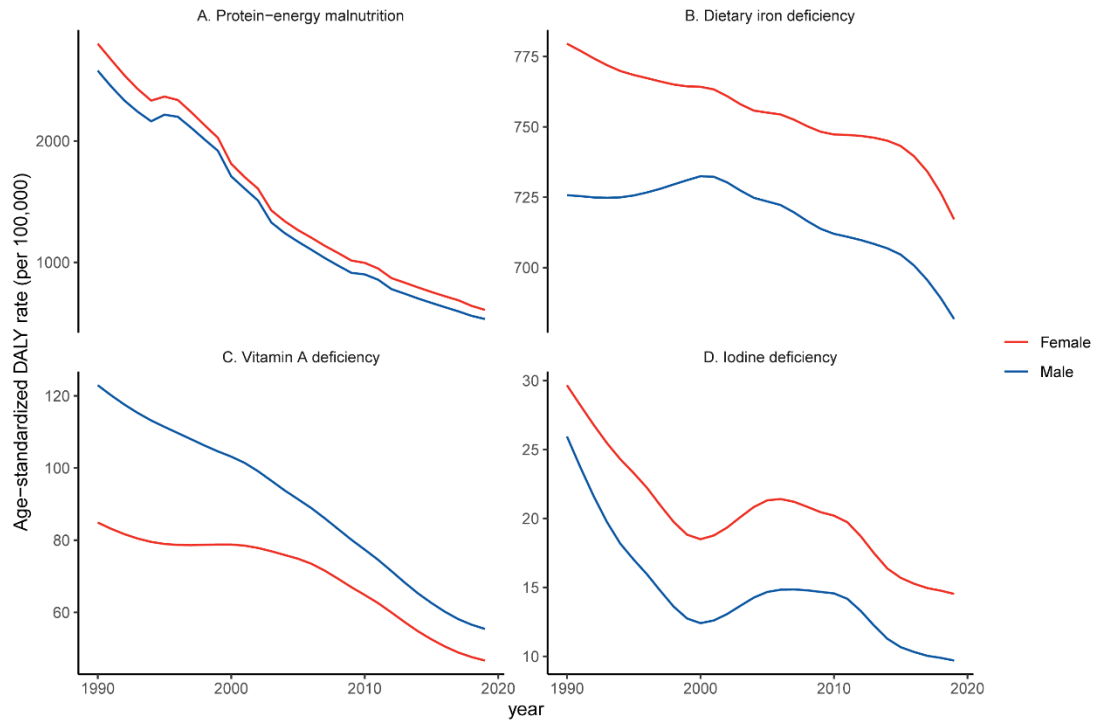

**Figure S4** Global age-standardized DALY rates of protein-energy malnutrition, dietary iron deficiency, vitamin A deficiency and iodine deficiency in males and females, 1990 to 2019

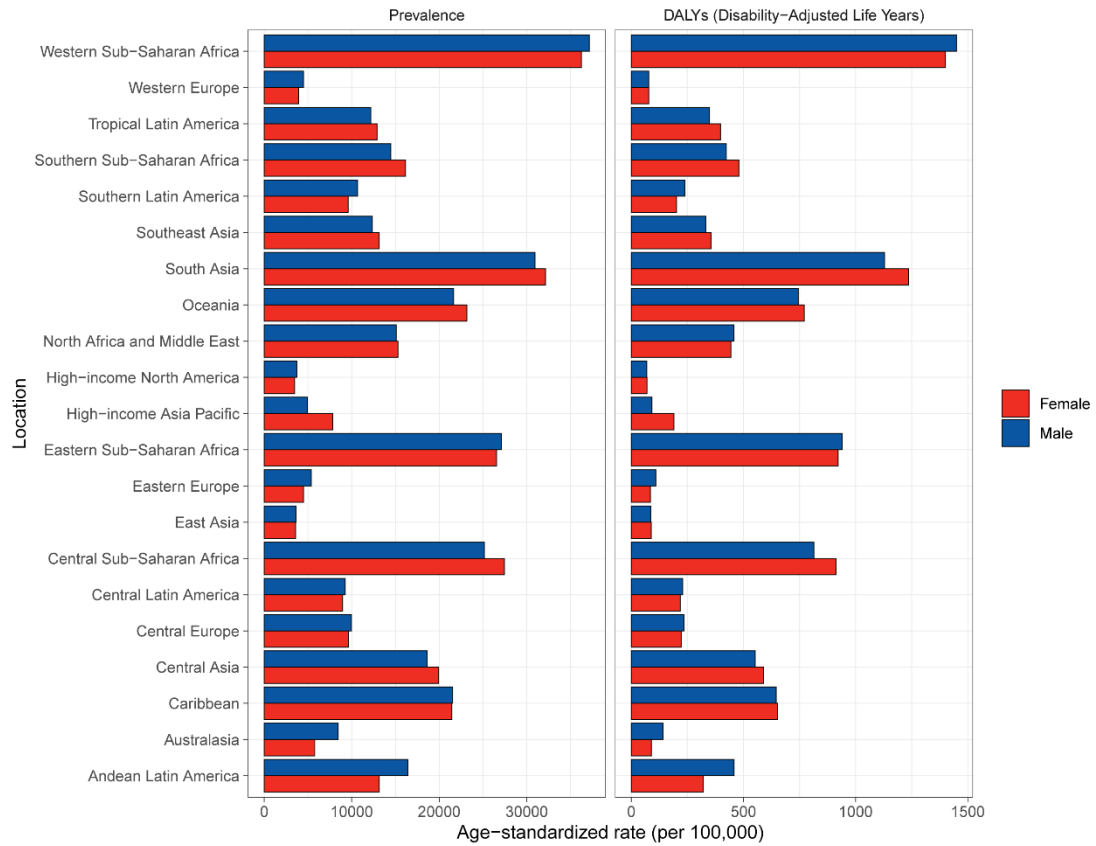

**Figure S5** The age-standardized prevalence and DALY rates of dietary iron deficiency by sex in 21 GBD regions, 2019

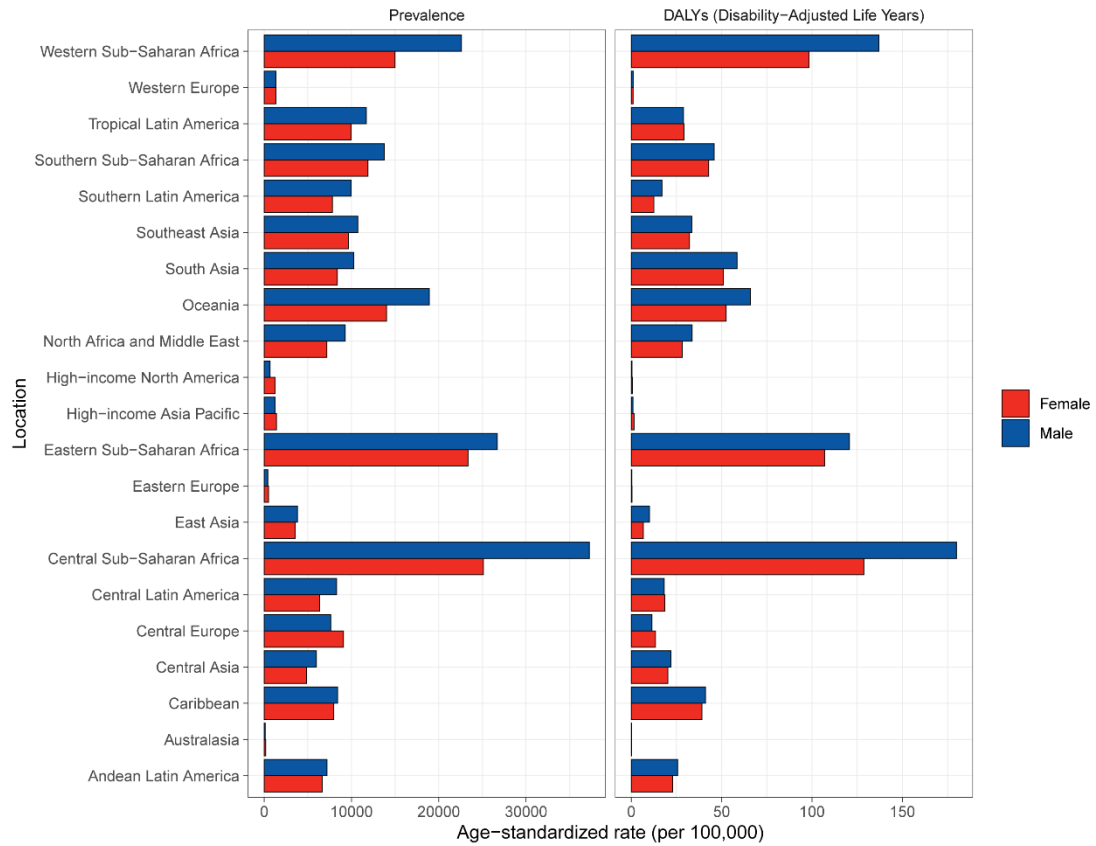

**Figure S6** The age-standardized prevalence and DALY rates of vitamin A deficiency by sex in 21 GBD regions, 2019



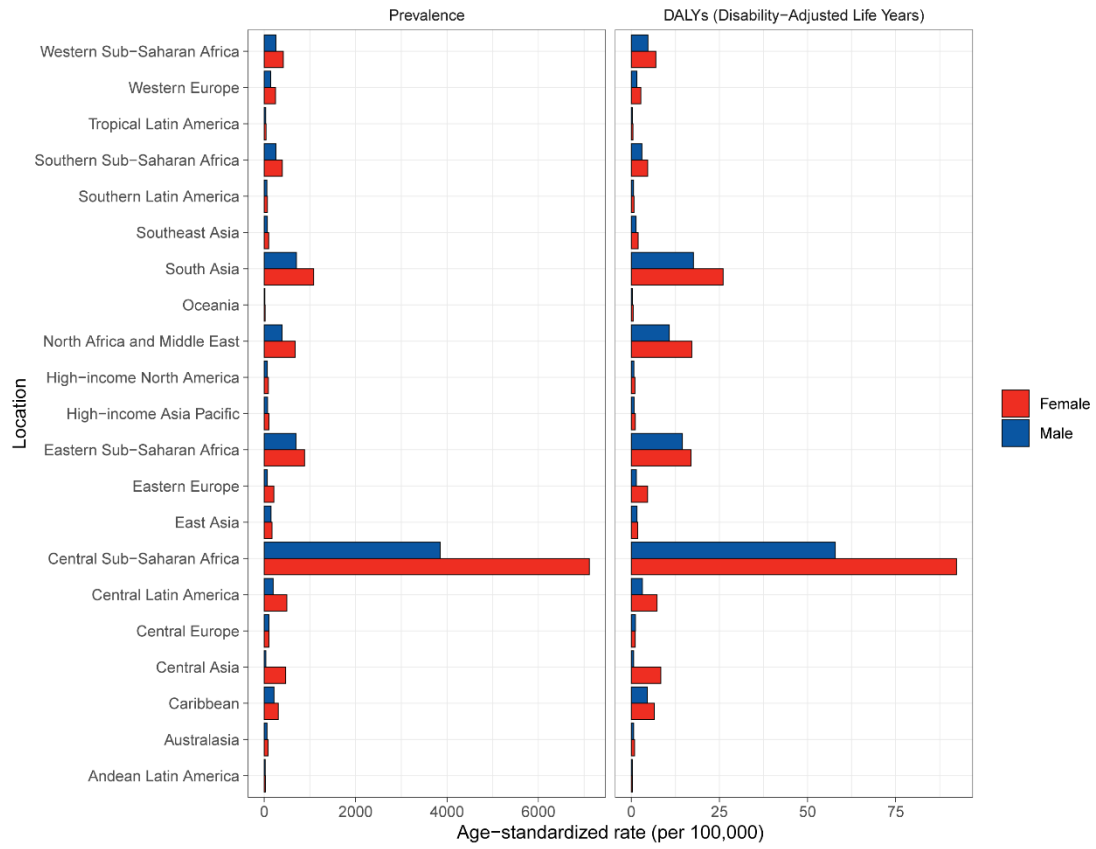

**Figure S7** The age-standardized prevalence and DALY rates of iodine deficiency by sex in 21 GBD regions, 2019

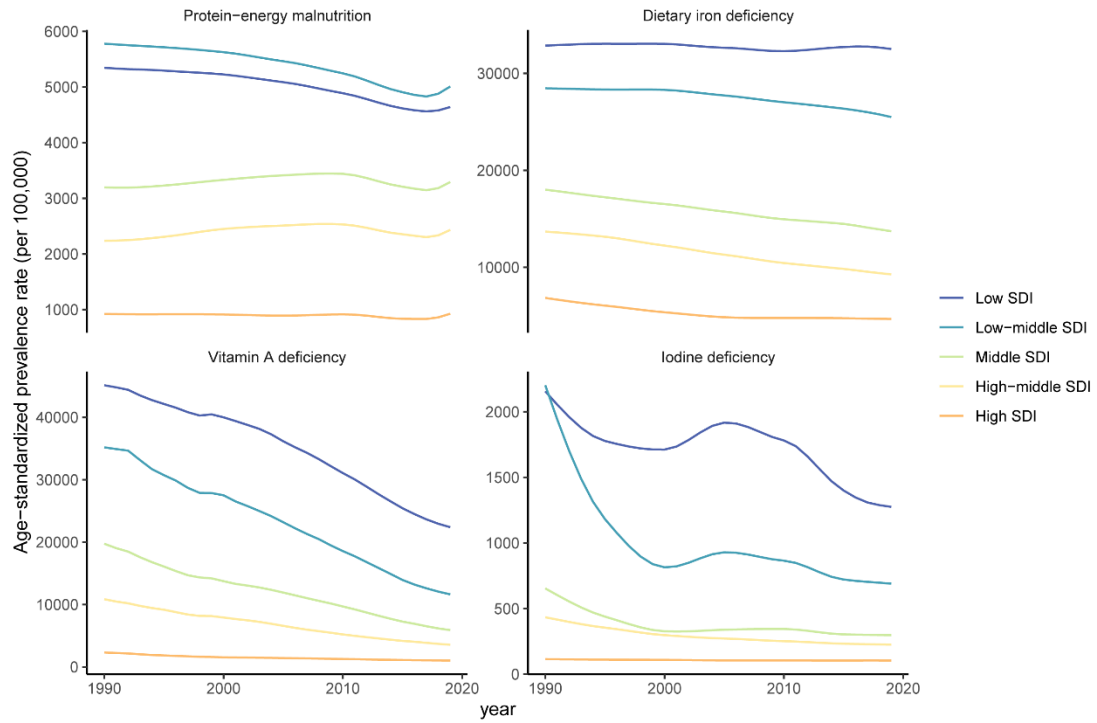

**Figure S8** The age-standardized prevalence rates of protein-energy malnutrition, dietary iron deficiency, vitamin A deficiency and iodine deficiency in different SDI quintiles, 1990 to 2019. SDI: socio-demographic index

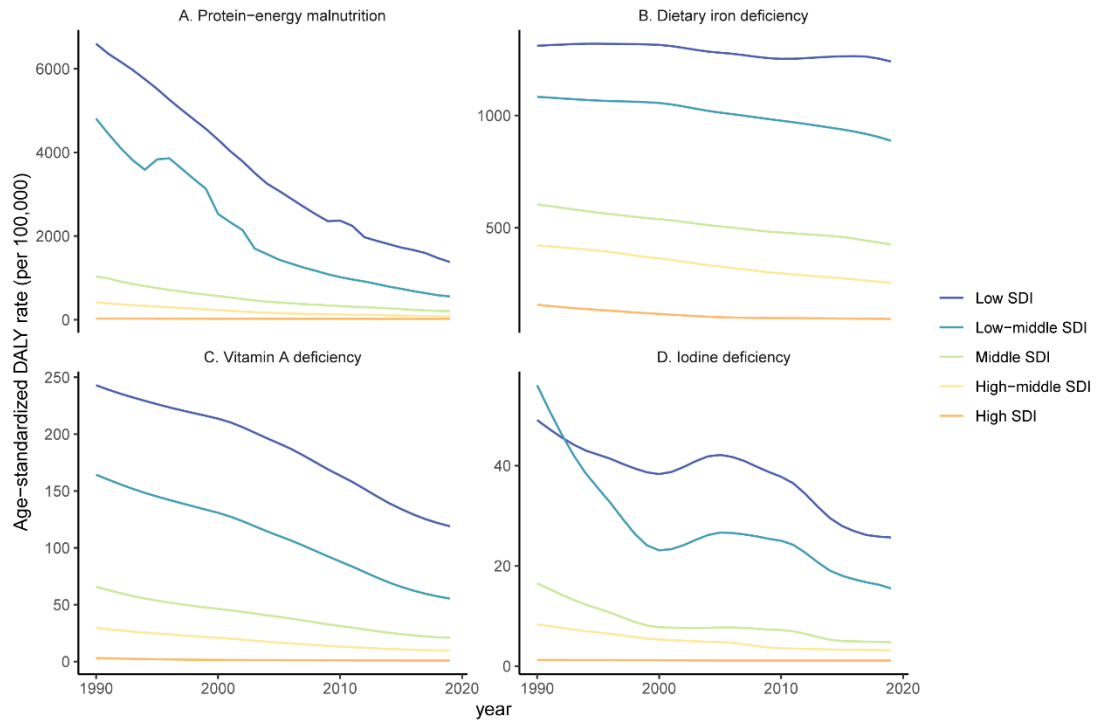

**Figure S9** The age-standardized DALY rates of protein-energy malnutrition, dietary iron deficiency, vitamin A deficiency and iodine deficiency in different SDI quintiles, 1990 to 2019. DALY: disability-adjusted life year; SDI: socio-demographic index

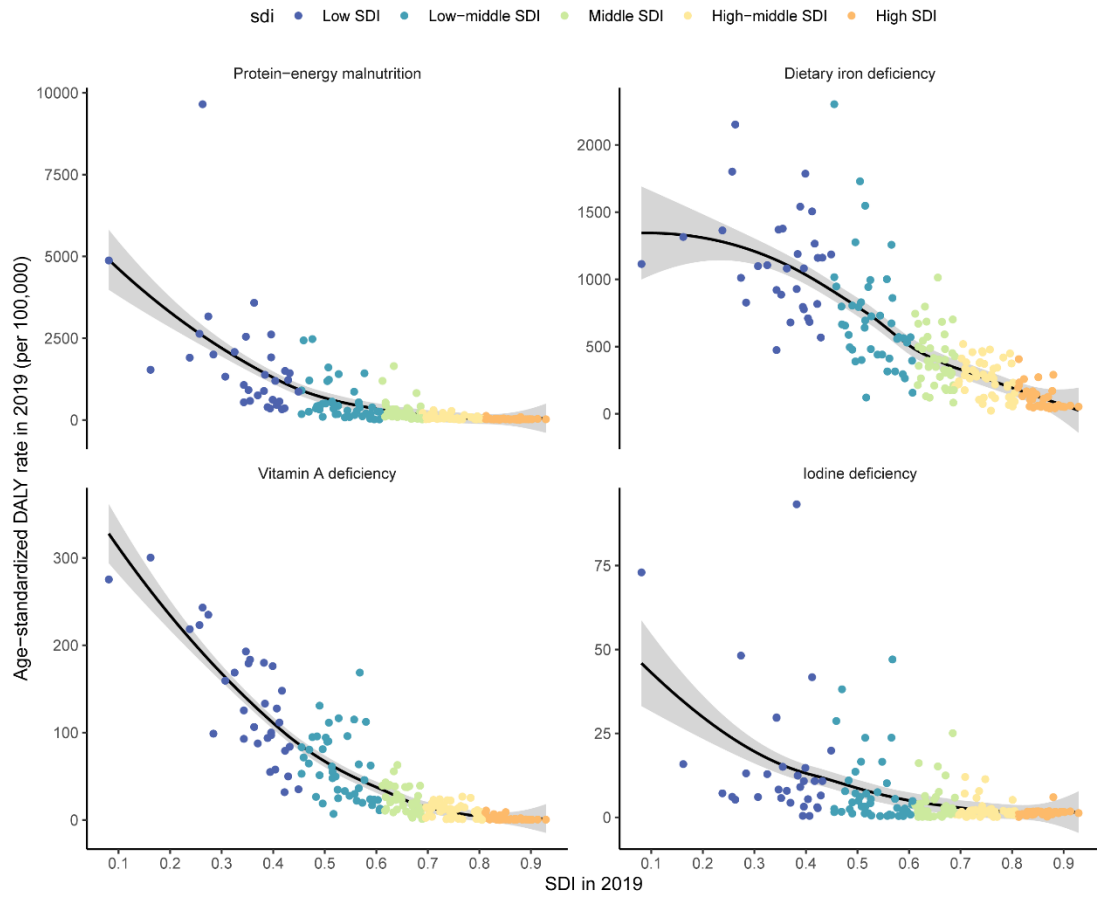

**Figure S10** The relationships between age-standardized DALY rates of four nutritional deficiencies and SDI across all countries/territories in 2019. DALY: disability-adjusted life year; SDI: socio-demographic index

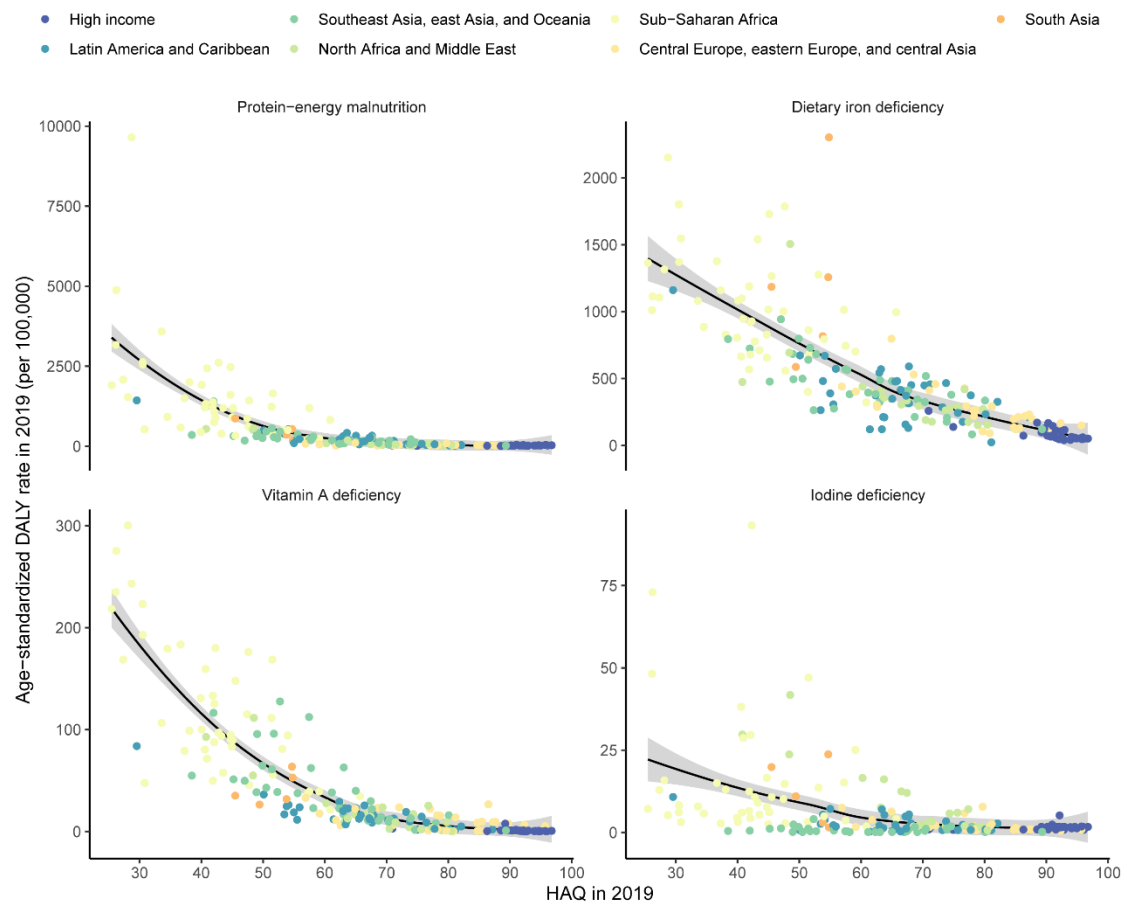

**Figure S11** The relationships between age-standardized DALY rates of four nutritional deficiencies and HAQ across all countries/territories in 2019. DALY: disability-adjusted life year; HAQ: Healthcare access and quality

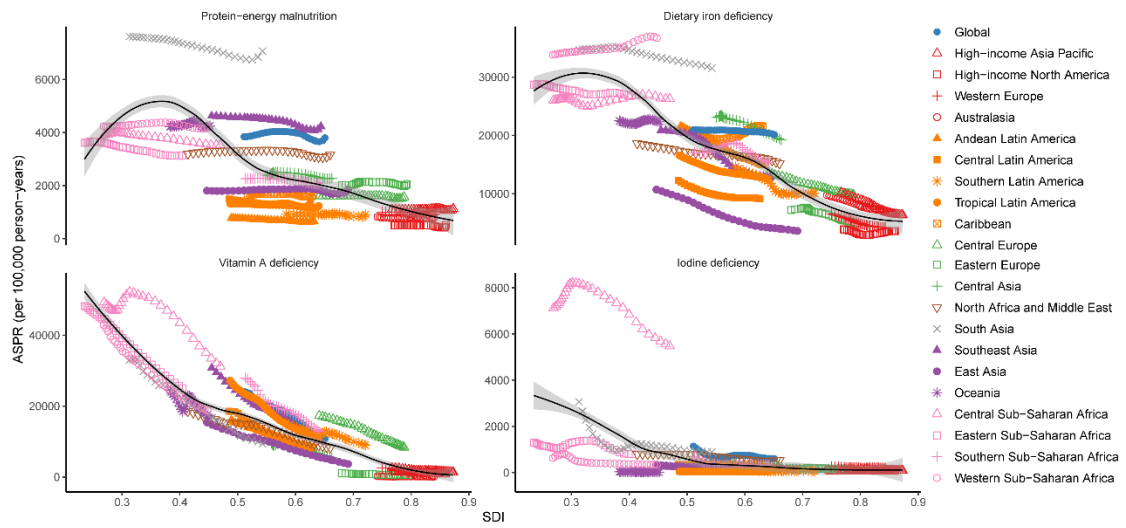

**Figure S12** The age-standardized prevalence rates of protein-energy malnutrition, dietary iron deficiency, vitamin A deficiency and iodine deficiency for 21 GBD regions by socio-demographic index, 1990 to 2019. SDI: socio-demographic index; ASPR: age-standardized prevalence rate

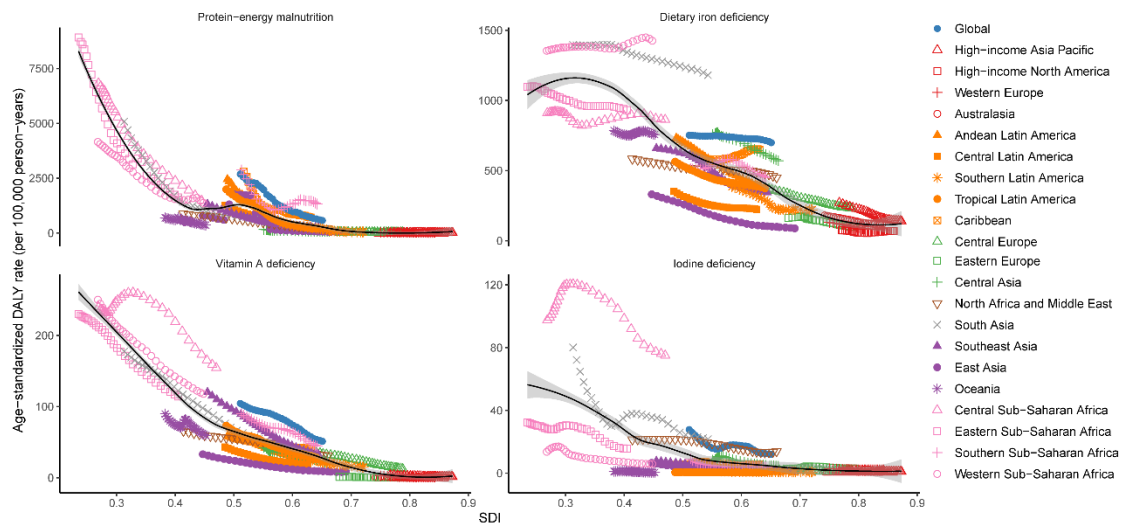

**Figure S13** The age-standardized DALY rates of protein-energy malnutrition, dietary iron deficiency, vitamin A deficiency and iodine deficiency for 21 GBD regions by socio-demographic index, 1990 to 2019. SDI: socio-demographic index; DALY: disability-adjusted life year

#### Additional File 4: Supplementary tables

**Table S1** Count and rates of protein-energy malnutrition, dietary iron deficiency, vitamin A deficiency and iodine deficiency prevalence in 21 GBD regions in 2019

| location             | Cause                       | Age         | Number                    | Rate                         |
|----------------------|-----------------------------|-------------|---------------------------|------------------------------|
| Andean Latin America | Dietary iron deficiency     | <5 years    | 1499751 (1282446-1747029) | 23674.4 (20244.11-27577.81)  |
| Andean Latin America | Dietary iron deficiency     | 10-14 years | 308300 (192926-474334)    | 5406.86 (3383.47-8318.71)    |
| Andean Latin America | Dietary iron deficiency     | 5-9 years   | 878669 (618093-1192064)   | 14514.04 (10209.79-19690.75) |
| Andean Latin America | Iodine deficiency           | <5 years    | 219 (101-380)             | 3.46 (1.6-5.99)              |
| Andean Latin America | Iodine deficiency           | 10-14 years | 3038 (1483-5140)          | 53.28 (26.01-90.15)          |
| Andean Latin America | Iodine deficiency           | 5-9 years   | 1377 (635-2378)           | 22.74 (10.49-39.28)          |
| Andean Latin America | Protein-energy malnutrition | <5 years    | 98806 (95174-102871)      | 1559.71 (1502.38-1623.88)    |
| Andean Latin America | Protein-energy malnutrition | 10-14 years | 10353 (7722-13759)        | 181.57 (135.42-241.3)        |
| Andean Latin America | Protein-energy malnutrition | 5-9 years   | 9870 (6592-14017)         | 163.04 (108.89-231.54)       |
| Andean Latin America | Vitamin A deficiency        | <5 years    | 486312 (374576-634286)    | 7676.71 (5912.89-10012.56)   |
| Andean Latin America | Vitamin A deficiency        | 10-14 years | 369925 (265270-519090)    | 6487.62 (4652.2-9103.63)     |
| Andean Latin America | Vitamin A deficiency        | 5-9 years   | 399772 (282426-561955)    | 6603.52 (4665.16-9282.48)    |
| Australasia          | Dietary iron deficiency     | <5 years    | 280172 (174923-434927)    | 15400.54 (9615.18-23907.16)  |
| Australasia          | Dietary iron deficiency     | 10-14 years | 19023 (6436-45477)        | 1042.32 (352.63-2491.84)     |
| Australasia          | Dietary iron deficiency     | 5-9 years   | 79587 (32454-167823)      | 4327.25 (1764.59-9124.77)    |
| Australasia          | Iodine deficiency           | <5 years    | 178 (99-279)              | 9.79 (5.42-15.31)            |
| Australasia          | Iodine deficiency           | 10-14 years | 2767 (1606-4231)          | 151.62 (88-231.86)           |
| Australasia          | Iodine deficiency           | 5-9 years   | 1184 (654-1849)           | 64.37 (35.58-100.55)         |
| Australasia          | Protein-energy malnutrition | <5 years    | 32625 (30954-34366)       | 1793.33 (1701.51-1889.02)    |
| Australasia          | Protein-energy malnutrition | 10-14 years | 4475 (2914-6745)          | 245.2 (159.69-369.56)        |
| Australasia          | Protein-energy malnutrition | 5-9 years   | 4798 (2984-7446)          | 260.86 (162.24-404.84)       |
| Australasia          | Vitamin A deficiency        | <5 years    | 2742 (1837-4075)          | 150.71 (100.97-224)          |



|              |                             |             |                           |                              |
|--------------|-----------------------------|-------------|---------------------------|------------------------------|
| Australasia  | Vitamin A deficiency        | 10-14 years | 2650 (1617-4174)          | 145.18 (88.61-228.71)        |
| Australasia  | Vitamin A deficiency        | 5-9 years   | 2834 (1754-4349)          | 154.09 (95.38-236.45)        |
| Caribbean    | Dietary iron deficiency     | <5 years    | 1216159 (1096335-1338269) | 30787.31 (27753.95-33878.55) |
| Caribbean    | Dietary iron deficiency     | 10-14 years | 442561 (316299-577151)    | 11614.56 (8300.95-15146.74)  |
| Caribbean    | Dietary iron deficiency     | 5-9 years   | 829841 (683661-988423)    | 21152.97 (17426.8-25195.29)  |
| Caribbean    | Iodine deficiency           | <5 years    | 1442 (754-2284)           | 36.5 (19.1-57.83)            |
| Caribbean    | Iodine deficiency           | 10-14 years | 20529 (11474-31621)       | 538.78 (301.13-829.85)       |
| Caribbean    | Iodine deficiency           | 5-9 years   | 9161 (4786-14430)         | 233.51 (121.99-367.84)       |
| Caribbean    | Protein-energy malnutrition | <5 years    | 163192 (157426-169041)    | 4131.24 (3985.26-4279.31)    |
| Caribbean    | Protein-energy malnutrition | 10-14 years | 10818 (7555-15229)        | 283.91 (198.27-399.68)       |
| Caribbean    | Protein-energy malnutrition | 5-9 years   | 13068 (8706-18674)        | 333.11 (221.92-476.02)       |
| Caribbean    | Vitamin A deficiency        | <5 years    | 417030 (322514-544513)    | 10557.21 (8164.5-13784.44)   |
| Caribbean    | Vitamin A deficiency        | 10-14 years | 255642 (174407-375656)    | 6709.08 (4577.13-9858.72)    |
| Caribbean    | Vitamin A deficiency        | 5-9 years   | 280669 (188233-403133)    | 7154.35 (4798.13-10276.02)   |
| Central Asia | Dietary iron deficiency     | <5 years    | 2780802 (2457680-3109680) | 29050.18 (25674.63-32485.86) |
| Central Asia | Dietary iron deficiency     | 10-14 years | 831280 (602398-1105431)   | 10385.52 (7526-13810.6)      |
| Central Asia | Dietary iron deficiency     | 5-9 years   | 1620863 (1251660-2007002) | 17385.42 (13425.33-21527.15) |
| Central Asia | Iodine deficiency           | <5 years    | 3217 (2115-4523)          | 33.6 (22.09-47.25)           |
| Central Asia | Iodine deficiency           | 10-14 years | 40823 (27726-57244)       | 510.02 (346.39-715.17)       |
| Central Asia | Iodine deficiency           | 5-9 years   | 20513 (13522-28933)       | 220.02 (145.04-310.33)       |
| Central Asia | Protein-energy malnutrition | <5 years    | 570770 (551963-589118)    | 5962.66 (5766.19-6154.34)    |
| Central Asia | Protein-energy malnutrition | 10-14 years | 20892 (13169-30653)       | 261.02 (164.52-382.96)       |
| Central Asia | Protein-energy malnutrition | 5-9 years   | 31499 (19775-46327)       | 337.85 (212.1-496.9)         |
| Central Asia | Vitamin A deficiency        | <5 years    | 684742 (551247-847805)    | 7153.29 (5758.71-8856.76)    |
| Central Asia | Vitamin A deficiency        | 10-14 years | 311704 (227144-421560)    | 3894.25 (2837.81-5266.72)    |
| Central Asia | Vitamin A deficiency        | 5-9 years   | 473339 (360724-642967)    | 5077.05 (3869.14-6896.48)    |

|                            |                             |             |                           |                              |
|----------------------------|-----------------------------|-------------|---------------------------|------------------------------|
| Central Europe             | Dietary iron deficiency     | <5 years    | 947281 (797904-1123276)   | 16759.49 (14116.69-19873.24) |
| Central Europe             | Dietary iron deficiency     | 10-14 years | 240234 (168321-334225)    | 3959.03 (2773.9-5507.98)     |
| Central Europe             | Dietary iron deficiency     | 5-9 years   | 476567 (358343-635736)    | 8055.21 (6056.93-10745.59)   |
| Central Europe             | Iodine deficiency           | <5 years    | 801 (500-1172)            | 14.17 (8.85-20.73)           |
| Central Europe             | Iodine deficiency           | 10-14 years | 13340 (8483-19323)        | 219.85 (139.79-318.43)       |
| Central Europe             | Iodine deficiency           | 5-9 years   | 5486 (3405-7951)          | 92.73 (57.55-134.39)         |
| Central Europe             | Protein-energy malnutrition | <5 years    | 191274 (185638-197020)    | 3384.06 (3284.35-3485.71)    |
| Central Europe             | Protein-energy malnutrition | 10-14 years | 31168 (20770-44111)       | 513.65 (342.28-726.94)       |
| Central Europe             | Protein-energy malnutrition | 5-9 years   | 39193 (26094-54912)       | 662.47 (441.05-928.15)       |
| Central Europe             | Vitamin A deficiency        | <5 years    | 536276 (462364-632274)    | 9487.91 (8180.24-11186.32)   |
| Central Europe             | Vitamin A deficiency        | 10-14 years | 473972 (385189-581613)    | 7811 (6347.87-9584.91)       |
| Central Europe             | Vitamin A deficiency        | 5-9 years   | 451617 (367956-547503)    | 7633.49 (6219.41-9254.21)    |
| Central Latin America      | Dietary iron deficiency     | <5 years    | 3400111 (3109805-3731726) | 15700.28 (14359.77-17231.54) |
| Central Latin America      | Dietary iron deficiency     | 10-14 years | 706266 (586456-843747)    | 3205.44 (2661.67-3829.41)    |
| Central Latin America      | Dietary iron deficiency     | 5-9 years   | 1698486 (1471741-1970686) | 7827.64 (6782.66-9082.09)    |
| Central Latin America      | Iodine deficiency           | <5 years    | 10030 (6471-14211)        | 46.31 (29.88-65.62)          |
| Central Latin America      | Iodine deficiency           | 10-14 years | 156380 (104782-218603)    | 709.74 (475.56-992.15)       |
| Central Latin America      | Iodine deficiency           | 5-9 years   | 66753 (43140-94524)       | 307.64 (198.82-435.62)       |
| Central Latin America      | Protein-energy malnutrition | <5 years    | 594297 (583887-604904)    | 2744.21 (2696.15-2793.19)    |
| Central Latin America      | Protein-energy malnutrition | 10-14 years | 116795 (81825-164153)     | 530.08 (371.37-745.02)       |
| Central Latin America      | Protein-energy malnutrition | 5-9 years   | 115423 (76804-167562)     | 531.94 (353.96-772.23)       |
| Central Latin America      | Vitamin A deficiency        | <5 years    | 1916133 (1515626-2465571) | 8847.9 (6998.52-11384.97)    |
| Central Latin America      | Vitamin A deficiency        | 10-14 years | 1269905 (863182-1828042)  | 5763.56 (3917.62-8296.71)    |
| Central Latin America      | Vitamin A deficiency        | 5-9 years   | 1572040 (1078381-2351211) | 7244.9 (4969.82-10835.78)    |
| Central Sub-Saharan Africa | Dietary iron deficiency     | <5 years    | 7112666 (6416229-7824470) | 34360.08 (30995.71-37798.69) |
| Central Sub-Saharan Africa | Dietary iron deficiency     | 10-14 years | 2780568 (1972191-3628084) | 16402.99 (11634.25-21402.61) |

|                            |                             |             |                            |                              |
|----------------------------|-----------------------------|-------------|----------------------------|------------------------------|
| Central Sub-Saharan Africa | Dietary iron deficiency     | 5-9 years   | 5286847 (4236786-6455870)  | 27253.62 (21840.57-33279.92) |
| Central Sub-Saharan Africa | Iodine deficiency           | <5 years    | 159226 (105111-217015)     | 769.19 (507.77-1048.36)      |
| Central Sub-Saharan Africa | Iodine deficiency           | 10-14 years | 1908610 (1339575-2500679)  | 11259.17 (7902.36-14751.88)  |
| Central Sub-Saharan Africa | Iodine deficiency           | 5-9 years   | 957834 (644200-1282080)    | 4937.62 (3320.84-6609.1)     |
| Central Sub-Saharan Africa | Protein-energy malnutrition | <5 years    | 2005052 (1919074-2094509)  | 9686.07 (9270.72-10118.22)   |
| Central Sub-Saharan Africa | Protein-energy malnutrition | 10-14 years | 34611 (25254-46610)        | 204.17 (148.98-274.96)       |
| Central Sub-Saharan Africa | Protein-energy malnutrition | 5-9 years   | 47796 (33885-65117)        | 246.39 (174.68-335.68)       |
| Central Sub-Saharan Africa | Vitamin A deficiency        | <5 years    | 9140620 (7581177-10704360) | 44156.78 (36623.38-51710.95) |
| Central Sub-Saharan Africa | Vitamin A deficiency        | 10-14 years | 3891272 (2578583-5338165)  | 22955.2 (15211.45-31490.63)  |
| Central Sub-Saharan Africa | Vitamin A deficiency        | 5-9 years   | 4949044 (3526115-6654513)  | 25512.25 (18177.07-34303.92) |
| East Asia                  | Dietary iron deficiency     | <5 years    | 5263147 (4248108-6384377)  | 6255.32 (5048.93-7587.91)    |
| East Asia                  | Dietary iron deficiency     | 10-14 years | 1298665 (846827-1889571)   | 1771.25 (1154.99-2577.19)    |
| East Asia                  | Dietary iron deficiency     | 5-9 years   | 1993690 (1341577-2807761)  | 2649.5 (1782.88-3731.35)     |
| East Asia                  | Iodine deficiency           | <5 years    | 15681 (7949-27336)         | 18.64 (9.45-32.49)           |
| East Asia                  | Iodine deficiency           | 10-14 years | 262074 (164199-412811)     | 357.44 (223.95-563.03)       |
| East Asia                  | Iodine deficiency           | 5-9 years   | 90642 (46086-156757)       | 120.46 (61.25-208.32)        |
| East Asia                  | Protein-energy malnutrition | <5 years    | 2636186 (2480094-2807432)  | 3133.14 (2947.62-3336.67)    |
| East Asia                  | Protein-energy malnutrition | 10-14 years | 805035 (534569-1159610)    | 1097.99 (729.1-1581.59)      |
| East Asia                  | Protein-energy malnutrition | 5-9 years   | 910338 (576124-1337035)    | 1209.79 (765.64-1776.84)     |
| East Asia                  | Vitamin A deficiency        | <5 years    | 3446249 (2236149-5292442)  | 4095.91 (2657.69-6290.13)    |
| East Asia                  | Vitamin A deficiency        | 10-14 years | 2264748 (1343414-3821207)  | 3088.89 (1832.28-5211.75)    |
| East Asia                  | Vitamin A deficiency        | 5-9 years   | 2868283 (1730043-4624995)  | 3811.78 (2299.13-6146.35)    |
| Eastern Europe             | Dietary iron deficiency     | <5 years    | 1177947 (805960-1695659)   | 9548.49 (6533.15-13745.09)   |
| Eastern Europe             | Dietary iron deficiency     | 10-14 years | 174143 (91987-312684)      | 1493.33 (788.82-2681.37)     |
| Eastern Europe             | Dietary iron deficiency     | 5-9 years   | 447608 (232540-816791)     | 3426.93 (1780.36-6253.45)    |
| Eastern Europe             | Iodine deficiency           | <5 years    | 2249 (1498-3169)           | 18.23 (12.14-25.69)          |

|                            |                             |             |                              |                              |
|----------------------------|-----------------------------|-------------|------------------------------|------------------------------|
| Eastern Europe             | Iodine deficiency           | 10-14 years | 33283 (22847-45920)          | 285.42 (195.92-393.78)       |
| Eastern Europe             | Iodine deficiency           | 5-9 years   | 15844 (10575-22302)          | 121.31 (80.96-170.74)        |
| Eastern Europe             | Protein-energy malnutrition | <5 years    | 602257 (565181-636252)       | 4881.93 (4581.39-5157.49)    |
| Eastern Europe             | Protein-energy malnutrition | 10-14 years | 53739 (35829-75719)          | 460.83 (307.25-649.31)       |
| Eastern Europe             | Protein-energy malnutrition | 5-9 years   | 82208 (55848-114389)         | 629.39 (427.58-875.77)       |
| Eastern Europe             | Vitamin A deficiency        | <5 years    | 66833 (50228-89429)          | 541.75 (407.15-724.91)       |
| Eastern Europe             | Vitamin A deficiency        | 10-14 years | 46733 (33563-65794)          | 400.75 (287.82-564.2)        |
| Eastern Europe             | Vitamin A deficiency        | 5-9 years   | 56009 (38760-79084)          | 428.81 (296.75-605.48)       |
| Eastern Sub-Saharan Africa | Dietary iron deficiency     | <5 years    | 23196909 (22309235-24069046) | 36166.93 (34782.94-37526.71) |
| Eastern Sub-Saharan Africa | Dietary iron deficiency     | 10-14 years | 8592394 (7615028-9630280)    | 16037.51 (14213.27-17974.69) |
| Eastern Sub-Saharan Africa | Dietary iron deficiency     | 5-9 years   | 16064781 (14786485-17402971) | 27314.29 (25140.86-29589.57) |
| Eastern Sub-Saharan Africa | Iodine deficiency           | <5 years    | 62786 (36322-99855)          | 97.89 (56.63-155.69)         |
| Eastern Sub-Saharan Africa | Iodine deficiency           | 10-14 years | 914399 (610881-1326400)      | 1706.71 (1140.2-2475.69)     |
| Eastern Sub-Saharan Africa | Iodine deficiency           | 5-9 years   | 377889 (221110-589610)       | 642.51 (375.94-1002.49)      |
| Eastern Sub-Saharan Africa | Protein-energy malnutrition | <5 years    | 5410116 (5336589-5486486)    | 8435.06 (8320.42-8554.13)    |
| Eastern Sub-Saharan Africa | Protein-energy malnutrition | 10-14 years | 145797 (108081-192894)       | 272.13 (201.73-360.03)       |
| Eastern Sub-Saharan Africa | Protein-energy malnutrition | 5-9 years   | 187948 (131873-258016)       | 319.56 (224.22-438.69)       |
| Eastern Sub-Saharan Africa | Vitamin A deficiency        | <5 years    | 22053625 (19938201-24290274) | 34384.41 (31086.19-37871.63) |
| Eastern Sub-Saharan Africa | Vitamin A deficiency        | 10-14 years | 10258044 (8693240-12053585)  | 19146.4 (16225.73-22497.74)  |
| Eastern Sub-Saharan Africa | Vitamin A deficiency        | 5-9 years   | 12298713 (10460278-14406050) | 20911 (17785.19-24494.02)    |
| High-income Asia Pacific   | Dietary iron deficiency     | <5 years    | 743010 (515835-1073210)      | 10197.16 (7079.37-14728.85)  |
| High-income Asia Pacific   | Dietary iron deficiency     | 10-14 years | 274887 (139120-500412)       | 3392.61 (1717-6176)          |
| High-income Asia Pacific   | Dietary iron deficiency     | 5-9 years   | 408352 (207040-705176)       | 5134.33 (2603.17-8866.38)    |
| High-income Asia Pacific   | Iodine deficiency           | <5 years    | 882 (489-1351)               | 12.1 (6.71-18.54)            |
| High-income Asia Pacific   | Iodine deficiency           | 10-14 years | 15059 (8882-22847)           | 185.86 (109.62-281.98)       |
| High-income Asia Pacific   | Iodine deficiency           | 5-9 years   | 6265 (3497-9598)             | 78.78 (43.97-120.67)         |

|                              |                             |             |                              |                              |
|------------------------------|-----------------------------|-------------|------------------------------|------------------------------|
| High-income Asia Pacific     | Protein-energy malnutrition | <5 years    | 174013 (171265-176761)       | 2388.17 (2350.46-2425.89)    |
| High-income Asia Pacific     | Protein-energy malnutrition | 10-14 years | 33811 (22379-48980)          | 417.29 (276.2-604.5)         |
| High-income Asia Pacific     | Protein-energy malnutrition | 5-9 years   | 38233 (24901-55374)          | 480.72 (313.09-696.23)       |
| High-income Asia Pacific     | Vitamin A deficiency        | <5 years    | 111127 (77372-155358)        | 1525.12 (1061.86-2132.15)    |
| High-income Asia Pacific     | Vitamin A deficiency        | 10-14 years | 89650 (57033-135669)         | 1106.44 (703.89-1674.41)     |
| High-income Asia Pacific     | Vitamin A deficiency        | 5-9 years   | 105104 (66922-159774)        | 1321.5 (841.43-2008.88)      |
| High-income North America    | Dietary iron deficiency     | <5 years    | 1008124 (641913-1504906)     | 4804.26 (3059.06-7171.69)    |
| High-income North America    | Dietary iron deficiency     | 10-14 years | 478650 (239065-823150)       | 2037.3 (1017.54-3503.61)     |
| High-income North America    | Dietary iron deficiency     | 5-9 years   | 843979 (431966-1440954)      | 3872.79 (1982.17-6612.14)    |
| High-income North America    | Iodine deficiency           | <5 years    | 2259 (1246-3545)             | 10.77 (5.94-16.89)           |
| High-income North America    | Iodine deficiency           | 10-14 years | 39088 (22969-59836)          | 166.37 (97.76-254.68)        |
| High-income North America    | Iodine deficiency           | 5-9 years   | 15398 (8567-24099)           | 70.66 (39.31-110.58)         |
| High-income North America    | Protein-energy malnutrition | <5 years    | 105496 (98293-113325)        | 502.74 (468.42-540.06)       |
| High-income North America    | Protein-energy malnutrition | 10-14 years | 116535 (78594-167685)        | 496.01 (334.52-713.72)       |
| High-income North America    | Protein-energy malnutrition | 5-9 years   | 117715 (75786-173215)        | 540.16 (347.76-794.84)       |
| High-income North America    | Vitamin A deficiency        | <5 years    | 268740 (182664-409632)       | 1280.69 (870.49-1952.12)     |
| High-income North America    | Vitamin A deficiency        | 10-14 years | 151138 (91699-240947)        | 643.3 (390.3-1025.55)        |
| High-income North America    | Vitamin A deficiency        | 5-9 years   | 206843 (126176-327033)       | 949.15 (578.99-1500.67)      |
| North Africa and Middle East | Dietary iron deficiency     | <5 years    | 14484383 (13473126-15480669) | 24253.87 (22560.53-25922.13) |
| North Africa and Middle East | Dietary iron deficiency     | 10-14 years | 3139362 (2464219-3989422)    | 5546.48 (4353.67-7048.33)    |
| North Africa and Middle East | Dietary iron deficiency     | 5-9 years   | 8828320 (7358358-10453357)   | 14832.05 (12362.44-17562.2)  |
| North Africa and Middle East | Iodine deficiency           | <5 years    | 43956 (29670-59921)          | 73.6 (49.68-100.34)          |
| North Africa and Middle East | Iodine deficiency           | 10-14 years | 619022 (437820-837949)       | 1093.66 (773.52-1480.45)     |
| North Africa and Middle East | Iodine deficiency           | 5-9 years   | 286025 (196864-389949)       | 480.54 (330.74-655.14)       |
| North Africa and Middle East | Protein-energy malnutrition | <5 years    | 4640323 (4561257-4719217)    | 7770.15 (7637.75-7902.25)    |
| North Africa and Middle East | Protein-energy malnutrition | 10-14 years | 352621 (243809-496064)       | 622.99 (430.75-876.42)       |

|                              |                             |             |                              |                              |
|------------------------------|-----------------------------|-------------|------------------------------|------------------------------|
| North Africa and Middle East | Protein-energy malnutrition | 5-9 years   | 461841 (317355-639044)       | 775.92 (533.17-1073.63)      |
| North Africa and Middle East | Vitamin A deficiency        | <5 years    | 7546115 (6537272-8548272)    | 12635.85 (10946.56-14313.94) |
| North Africa and Middle East | Vitamin A deficiency        | 10-14 years | 2991034 (2359910-3677804)    | 5284.42 (4169.38-6497.78)    |
| North Africa and Middle East | Vitamin A deficiency        | 5-9 years   | 3881312 (3120110-4773375)    | 6520.81 (5241.95-8019.53)    |
| Oceania                      | Dietary iron deficiency     | <5 years    | 611333 (523773-704102)       | 33032.21 (28301.12-38044.82) |
| Oceania                      | Dietary iron deficiency     | 10-14 years | 166770 (107919-235896)       | 11922.11 (7714.97-16863.83)  |
| Oceania                      | Dietary iron deficiency     | 5-9 years   | 333709 (242048-432746)       | 21115.25 (15315.45-27381.78) |
| Oceania                      | Iodine deficiency           | <5 years    | 44 (18-82)                   | 2.38 (0.98-4.41)             |
| Oceania                      | Iodine deficiency           | 10-14 years | 554 (256-978)                | 39.62 (18.28-69.89)          |
| Oceania                      | Iodine deficiency           | 5-9 years   | 258 (106-476)                | 16.31 (6.68-30.11)           |
| Oceania                      | Protein-energy malnutrition | <5 years    | 211798 (201820-221723)       | 11444.13 (10904.95-11980.4)  |
| Oceania                      | Protein-energy malnutrition | 10-14 years | 4743 (3504-6342)             | 339.07 (250.47-453.41)       |
| Oceania                      | Protein-energy malnutrition | 5-9 years   | 7283 (5120-9884)             | 460.84 (323.94-625.43)       |
| Oceania                      | Vitamin A deficiency        | <5 years    | 384257 (285147-511185)       | 20762.59 (15407.37-27620.95) |
| Oceania                      | Vitamin A deficiency        | 10-14 years | 197676 (140976-285429)       | 14131.58 (10078.17-20404.9)  |
| Oceania                      | Vitamin A deficiency        | 5-9 years   | 229063 (162378-331318)       | 14493.83 (10274.4-20963.99)  |
| South Asia                   | Dietary iron deficiency     | <5 years    | 63429223 (60818112-66152032) | 38581.2 (36992.98-40237.37)  |
| South Asia                   | Dietary iron deficiency     | 10-14 years | 38673925 (35561016-42173266) | 21522.48 (19790.11-23469.9)  |
| South Asia                   | Dietary iron deficiency     | 5-9 years   | 58002673 (53962437-61820263) | 33592.63 (31252.7-35803.61)  |
| South Asia                   | Iodine deficiency           | <5 years    | 180447 (105053-277263)       | 109.76 (63.9-168.65)         |
| South Asia                   | Iodine deficiency           | 10-14 years | 3461473 (2297678-4966393)    | 1926.35 (1278.68-2763.85)    |
| South Asia                   | Iodine deficiency           | 5-9 years   | 1239888 (718388-1897583)     | 718.09 (416.06-1099)         |
| South Asia                   | Protein-energy malnutrition | <5 years    | 27405626 (27113907-27676881) | 16669.64 (16492.2-16834.63)  |
| South Asia                   | Protein-energy malnutrition | 10-14 years | 3131087 (2219496-4265128)    | 1742.49 (1235.17-2373.59)    |
| South Asia                   | Protein-energy malnutrition | 5-9 years   | 3637885 (2595819-4926060)    | 2106.9 (1503.39-2852.96)     |
| South Asia                   | Vitamin A deficiency        | <5 years    | 23244615 (16435167-33202018) | 14138.68 (9996.79-20195.33)  |

|                        |                             |             |                             |                              |
|------------------------|-----------------------------|-------------|-----------------------------|------------------------------|
| South Asia             | Vitamin A deficiency        | 10-14 years | 11616282 (6939632-19334080) | 6464.59 (3861.98-10759.64)   |
| South Asia             | Vitamin A deficiency        | 5-9 years   | 12329365 (7604031-19826894) | 7140.63 (4403.92-11482.88)   |
| Southeast Asia         | Dietary iron deficiency     | <5 years    | 10425945 (9422856-11602684) | 19135.53 (17294.49-21295.29) |
| Southeast Asia         | Dietary iron deficiency     | 10-14 years | 3416543 (2565095-4375308)   | 5939.02 (4458.94-7605.65)    |
| Southeast Asia         | Dietary iron deficiency     | 5-9 years   | 7082729 (5942479-8370819)   | 12478.01 (10469.17-14747.31) |
| Southeast Asia         | Iodine deficiency           | <5 years    | 5016 (2425-8841)            | 9.21 (4.45-16.23)            |
| Southeast Asia         | Iodine deficiency           | 10-14 years | 108962 (69733-168628)       | 189.41 (121.22-293.13)       |
| Southeast Asia         | Iodine deficiency           | 5-9 years   | 33444 (16055-58532)         | 58.92 (28.28-103.12)         |
| Southeast Asia         | Protein-energy malnutrition | <5 years    | 5587015 (5502592-5672395)   | 10254.27 (10099.33-10410.98) |
| Southeast Asia         | Protein-energy malnutrition | 10-14 years | 553157 (397423-749316)      | 961.56 (690.85-1302.54)      |
| Southeast Asia         | Protein-energy malnutrition | 5-9 years   | 584509 (393256-828155)      | 1029.76 (692.82-1459)        |
| Southeast Asia         | Vitamin A deficiency        | <5 years    | 8485153 (6835710-10367852)  | 15573.45 (12546.1-19028.91)  |
| Southeast Asia         | Vitamin A deficiency        | 10-14 years | 3676103 (2702439-4946269)   | 6390.22 (4697.68-8598.16)    |
| Southeast Asia         | Vitamin A deficiency        | 5-9 years   | 4667838 (3460547-6159036)   | 8223.57 (6096.62-10850.69)   |
| Southern Latin America | Dietary iron deficiency     | <5 years    | 975508 (719513-1255583)     | 20095.57 (14822.06-25865.16) |
| Southern Latin America | Dietary iron deficiency     | 10-14 years | 125289 (53248-256918)       | 2539.74 (1079.39-5208.02)    |
| Southern Latin America | Dietary iron deficiency     | 5-9 years   | 356111 (165603-632824)      | 6957.2 (3235.31-12363.24)    |
| Southern Latin America | Iodine deficiency           | <5 years    | 437 (245-652)               | 8.99 (5.04-13.44)            |
| Southern Latin America | Iodine deficiency           | 10-14 years | 6698 (3779-9846)            | 135.78 (76.61-199.58)        |
| Southern Latin America | Iodine deficiency           | 5-9 years   | 3013 (1697-4486)            | 58.87 (33.16-87.64)          |
| Southern Latin America | Protein-energy malnutrition | <5 years    | 90915 (85773-96060)         | 1872.85 (1766.94-1978.84)    |
| Southern Latin America | Protein-energy malnutrition | 10-14 years | 19446 (13068-28122)         | 394.18 (264.91-570.06)       |
| Southern Latin America | Protein-energy malnutrition | 5-9 years   | 19883 (12248-29504)         | 388.44 (239.29-576.41)       |
| Southern Latin America | Vitamin A deficiency        | <5 years    | 511617 (360678-710299)      | 10539.37 (7430-14632.23)     |
| Southern Latin America | Vitamin A deficiency        | 10-14 years | 359108 (233271-552250)      | 7279.52 (4728.67-11194.73)   |
| Southern Latin America | Vitamin A deficiency        | 5-9 years   | 448186 (300300-663071)      | 8756.03 (5866.85-12954.15)   |

|                             |                             |             |                           |                              |
|-----------------------------|-----------------------------|-------------|---------------------------|------------------------------|
| Southern Sub-Saharan Africa | Dietary iron deficiency     | <5 years    | 1569165 (1371155-1784680) | 19381.14 (16935.47-22043.01) |
| Southern Sub-Saharan Africa | Dietary iron deficiency     | 10-14 years | 762961 (549901-1033084)   | 10154.27 (7318.66-13749.36)  |
| Southern Sub-Saharan Africa | Dietary iron deficiency     | 5-9 years   | 1273562 (979853-1648071)  | 15911.1 (12241.68-20589.98)  |
| Southern Sub-Saharan Africa | Iodine deficiency           | <5 years    | 3518 (1987-5585)          | 43.45 (24.54-68.98)          |
| Southern Sub-Saharan Africa | Iodine deficiency           | 10-14 years | 51641 (31711-78999)       | 687.3 (422.04-1051.41)       |
| Southern Sub-Saharan Africa | Iodine deficiency           | 5-9 years   | 22672 (12768-35626)       | 283.25 (159.52-445.09)       |
| Southern Sub-Saharan Africa | Protein-energy malnutrition | <5 years    | 439837 (430721-449262)    | 5432.53 (5319.93-5548.94)    |
| Southern Sub-Saharan Africa | Protein-energy malnutrition | 10-14 years | 22266 (15857-30329)       | 296.34 (211.04-403.65)       |
| Southern Sub-Saharan Africa | Protein-energy malnutrition | 5-9 years   | 28548 (19798-40006)       | 356.66 (247.34-499.81)       |
| Southern Sub-Saharan Africa | Vitamin A deficiency        | <5 years    | 1402683 (1109754-1765146) | 17324.88 (13706.84-21801.75) |
| Southern Sub-Saharan Africa | Vitamin A deficiency        | 10-14 years | 699836 (501256-937513)    | 9314.14 (6671.24-12477.4)    |
| Southern Sub-Saharan Africa | Vitamin A deficiency        | 5-9 years   | 917255 (655958-1236631)   | 11459.62 (8195.14-15449.71)  |
| Tropical Latin America      | Dietary iron deficiency     | <5 years    | 2911740 (2225375-3676599) | 18048.8 (13794.27-22789.87)  |
| Tropical Latin America      | Dietary iron deficiency     | 10-14 years | 1116417 (561411-1918308)  | 6576.46 (3307.09-11300.14)   |
| Tropical Latin America      | Dietary iron deficiency     | 5-9 years   | 2060812 (1247694-3049103) | 12411.43 (7514.35-18363.51)  |
| Tropical Latin America      | Iodine deficiency           | <5 years    | 813 (404-1365)            | 5.04 (2.5-8.46)              |
| Tropical Latin America      | Iodine deficiency           | 10-14 years | 13152 (7027-21806)        | 77.48 (41.39-128.45)         |
| Tropical Latin America      | Iodine deficiency           | 5-9 years   | 5479 (2731-9224)          | 33 (16.45-55.55)             |
| Tropical Latin America      | Protein-energy malnutrition | <5 years    | 488237 (478843-496526)    | 3026.4 (2968.17-3077.78)     |
| Tropical Latin America      | Protein-energy malnutrition | 10-14 years | 44143 (29974-63977)       | 260.03 (176.57-376.87)       |
| Tropical Latin America      | Protein-energy malnutrition | 5-9 years   | 45589 (29335-67505)       | 274.56 (176.67-406.56)       |
| Tropical Latin America      | Vitamin A deficiency        | <5 years    | 1873386 (1190131-2866542) | 11612.42 (7377.18-17768.63)  |
| Tropical Latin America      | Vitamin A deficiency        | 10-14 years | 1748203 (985729-2815801)  | 10298.1 (5806.61-16586.99)   |
| Tropical Latin America      | Vitamin A deficiency        | 5-9 years   | 1754845 (990420-2808829)  | 10568.72 (5964.9-16916.44)   |
| Western Europe              | Dietary iron deficiency     | <5 years    | 1589746 (1290584-1941473) | 7226.81 (5866.85-8825.72)    |
| Western Europe              | Dietary iron deficiency     | 10-14 years | 258338 (162896-388496)    | 1093.79 (689.7-1644.88)      |



|                            |                             |             |                              |                              |
|----------------------------|-----------------------------|-------------|------------------------------|------------------------------|
| Western Europe             | Dietary iron deficiency     | 5-9 years   | 936304 (646391-1350732)      | 4034.86 (2785.52-5820.78)    |
| Western Europe             | Iodine deficiency           | <5 years    | 5289 (2899-8506)             | 24.04 (13.18-38.67)          |
| Western Europe             | Iodine deficiency           | 10-14 years | 98928 (61699-150029)         | 418.86 (261.23-635.22)       |
| Western Europe             | Iodine deficiency           | 5-9 years   | 37107 (20470-59105)          | 159.91 (88.21-254.71)        |
| Western Europe             | Protein-energy malnutrition | <5 years    | 284987 (277828-292396)       | 1295.52 (1262.98-1329.2)     |
| Western Europe             | Protein-energy malnutrition | 10-14 years | 190685 (131820-268070)       | 807.35 (558.12-1135)         |
| Western Europe             | Protein-energy malnutrition | 5-9 years   | 204931 (135935-290389)       | 883.12 (585.79-1251.39)      |
| Western Europe             | Vitamin A deficiency        | <5 years    | 403925 (339154-486670)       | 1836.2 (1541.76-2212.35)     |
| Western Europe             | Vitamin A deficiency        | 10-14 years | 217363 (172874-272801)       | 920.31 (731.94-1155.03)      |
| Western Europe             | Vitamin A deficiency        | 5-9 years   | 293816 (234743-365974)       | 1266.16 (1011.59-1577.11)    |
| Western Sub-Saharan Africa | Dietary iron deficiency     | <5 years    | 33016023 (31582914-34377114) | 45394.17 (43423.77-47265.55) |
| Western Sub-Saharan Africa | Dietary iron deficiency     | 10-14 years | 13522683 (11067705-16131968) | 22773.53 (18639.11-27167.83) |
| Western Sub-Saharan Africa | Dietary iron deficiency     | 5-9 years   | 27019810 (24169979-29526396) | 40803.12 (36499.54-44588.36) |
| Western Sub-Saharan Africa | Iodine deficiency           | <5 years    | 31547 (17794-49893)          | 43.37 (24.47-68.6)           |
| Western Sub-Saharan Africa | Iodine deficiency           | 10-14 years | 421913 (262075-639865)       | 710.54 (441.36-1077.6)       |
| Western Sub-Saharan Africa | Iodine deficiency           | 5-9 years   | 192176 (108964-301197)       | 290.21 (164.55-454.84)       |
| Western Sub-Saharan Africa | Protein-energy malnutrition | <5 years    | 8071685 (7927547-8213444)    | 11097.87 (10899.69-11292.77) |
| Western Sub-Saharan Africa | Protein-energy malnutrition | 10-14 years | 265400 (187336-367413)       | 446.96 (315.49-618.76)       |
| Western Sub-Saharan Africa | Protein-energy malnutrition | 5-9 years   | 367126 (256284-508695)       | 554.4 (387.02-768.19)        |
| Western Sub-Saharan Africa | Vitamin A deficiency        | <5 years    | 17529669 (16042554-19333039) | 24101.77 (22057.12-26581.25) |
| Western Sub-Saharan Africa | Vitamin A deficiency        | 10-14 years | 8847157 (7773180-10099117)   | 14899.49 (13090.8-17007.91)  |
| Western Sub-Saharan Africa | Vitamin A deficiency        | 5-9 years   | 11238155 (9908623-12737035)  | 16970.95 (14963.2-19234.43)  |

**Table S2** Count and rates of protein-energy malnutrition, dietary iron deficiency, vitamin A deficiency and iodine deficiency DALY in 21 GBD regions in 2019

| Location             | Cause                       | Age         | Number              | Rate                   |
|----------------------|-----------------------------|-------------|---------------------|------------------------|
| Andean Latin America | Dietary iron deficiency     | <5 years    | 32571 (20099-51257) | 514.16 (317.28-809.13) |
| Andean Latin America | Dietary iron deficiency     | 10-14 years | 9896 (5030-18088)   | 173.55 (88.21-317.22)  |
| Andean Latin America | Dietary iron deficiency     | 5-9 years   | 28394 (15432-46625) | 469.02 (254.91-770.16) |
| Andean Latin America | Iodine deficiency           | <5 years    | 3 (1-6)             | 0.05 (0.02-0.1)        |
| Andean Latin America | Iodine deficiency           | 10-14 years | 41 (16-83)          | 0.72 (0.28-1.46)       |
| Andean Latin America | Iodine deficiency           | 5-9 years   | 19 (7-40)           | 0.31 (0.11-0.66)       |
| Andean Latin America | Protein-energy malnutrition | <5 years    | 37911 (25321-52906) | 598.45 (399.71-835.15) |
| Andean Latin America | Protein-energy malnutrition | 10-14 years | 1719 (1279-2284)    | 30.14 (22.43-40.06)    |
| Andean Latin America | Protein-energy malnutrition | 5-9 years   | 3028 (2244-3945)    | 50.01 (37.06-65.16)    |
| Andean Latin America | Vitamin A deficiency        | <5 years    | 2010 (1259-3123)    | 31.73 (19.87-49.29)    |
| Andean Latin America | Vitamin A deficiency        | 10-14 years | 766 (427-1251)      | 13.43 (7.49-21.94)     |
| Andean Latin America | Vitamin A deficiency        | 5-9 years   | 1625 (936-2604)     | 26.84 (15.47-43.01)    |
| Australasia          | Dietary iron deficiency     | <5 years    | 3880 (1741-7776)    | 213.3 (95.68-427.43)   |
| Australasia          | Dietary iron deficiency     | 10-14 years | 447 (135-1096)      | 24.49 (7.41-60.03)     |
| Australasia          | Dietary iron deficiency     | 5-9 years   | 1868 (634-4190)     | 101.56 (34.48-227.82)  |
| Australasia          | Iodine deficiency           | <5 years    | 2 (1-5)             | 0.11 (0.03-0.25)       |
| Australasia          | Iodine deficiency           | 10-14 years | 30 (12-63)          | 1.64 (0.64-3.46)       |
| Australasia          | Iodine deficiency           | 5-9 years   | 13 (5-27)           | 0.7 (0.25-1.45)        |
| Australasia          | Protein-energy malnutrition | <5 years    | 208 (138-304)       | 11.44 (7.57-16.7)      |
| Australasia          | Protein-energy malnutrition | 10-14 years | 195 (99-343)        | 10.66 (5.44-18.81)     |
| Australasia          | Protein-energy malnutrition | 5-9 years   | 208 (97-380)        | 11.33 (5.29-20.64)     |
| Australasia          | Vitamin A deficiency        | <5 years    | 6 (3-11)            | 0.31 (0.14-0.62)       |
| Australasia          | Vitamin A deficiency        | 10-14 years | 1 (0-2)             | 0.04 (0.01-0.11)       |
| Australasia          | Vitamin A deficiency        | 5-9 years   | 3 (1-8)             | 0.18 (0.05-0.45)       |

|                |                             |             |                      |                           |
|----------------|-----------------------------|-------------|----------------------|---------------------------|
| Caribbean      | Dietary iron deficiency     | <5 years    | 31271 (19929-46914)  | 791.62 (504.5-1187.64)    |
| Caribbean      | Dietary iron deficiency     | 10-14 years | 15130 (8381-25104)   | 397.06 (219.96-658.84)    |
| Caribbean      | Dietary iron deficiency     | 5-9 years   | 28895 (17041-44899)  | 736.55 (434.38-1144.49)   |
| Caribbean      | Iodine deficiency           | <5 years    | 31 (13-60)           | 0.79 (0.32-1.51)          |
| Caribbean      | Iodine deficiency           | 10-14 years | 427 (193-780)        | 11.2 (5.06-20.47)         |
| Caribbean      | Iodine deficiency           | 5-9 years   | 201 (80-394)         | 5.12 (2.04-10.04)         |
| Caribbean      | Protein-energy malnutrition | <5 years    | 73942 (46640-114176) | 1871.86 (1180.69-2890.39) |
| Caribbean      | Protein-energy malnutrition | 10-14 years | 1847 (1304-2615)     | 48.49 (34.23-68.64)       |
| Caribbean      | Protein-energy malnutrition | 5-9 years   | 4849 (3252-7055)     | 123.6 (82.88-179.83)      |
| Caribbean      | Vitamin A deficiency        | <5 years    | 2213 (1356-3425)     | 56.03 (34.33-86.7)        |
| Caribbean      | Vitamin A deficiency        | 10-14 years | 881 (466-1479)       | 23.12 (12.22-38.82)       |
| Caribbean      | Vitamin A deficiency        | 5-9 years   | 1548 (839-2581)      | 39.47 (21.39-65.78)       |
| Central Asia   | Dietary iron deficiency     | <5 years    | 70737 (43041-106458) | 738.97 (449.64-1112.14)   |
| Central Asia   | Dietary iron deficiency     | 10-14 years | 28243 (15610-45041)  | 352.85 (195.02-562.72)    |
| Central Asia   | Dietary iron deficiency     | 5-9 years   | 55820 (33860-86710)  | 598.72 (363.18-930.06)    |
| Central Asia   | Iodine deficiency           | <5 years    | 60 (31-105)          | 0.63 (0.32-1.1)           |
| Central Asia   | Iodine deficiency           | 10-14 years | 718 (360-1272)       | 8.97 (4.5-15.89)          |
| Central Asia   | Iodine deficiency           | 5-9 years   | 376 (169-664)        | 4.03 (1.81-7.12)          |
| Central Asia   | Protein-energy malnutrition | <5 years    | 16979 (11646-23389)  | 177.38 (121.67-244.34)    |
| Central Asia   | Protein-energy malnutrition | 10-14 years | 949 (544-1546)       | 11.86 (6.79-19.31)        |
| Central Asia   | Protein-energy malnutrition | 5-9 years   | 1396 (783-2285)      | 14.98 (8.4-24.51)         |
| Central Asia   | Vitamin A deficiency        | <5 years    | 2922 (1842-4399)     | 30.53 (19.24-45.96)       |
| Central Asia   | Vitamin A deficiency        | 10-14 years | 872 (505-1379)       | 10.9 (6.3-17.23)          |
| Central Asia   | Vitamin A deficiency        | 5-9 years   | 1937 (1185-3027)     | 20.78 (12.71-32.46)       |
| Central Europe | Dietary iron deficiency     | <5 years    | 18108 (10851-28372)  | 320.37 (191.98-501.96)    |
| Central Europe | Dietary iron deficiency     | 10-14 years | 7205 (4064-12019)    | 118.74 (66.98-198.07)     |

|                            |                             |             |                        |                          |
|----------------------------|-----------------------------|-------------|------------------------|--------------------------|
| Central Europe             | Dietary iron deficiency     | 5-9 years   | 14173 (7931-23080)     | 239.56 (134.05-390.12)   |
| Central Europe             | Iodine deficiency           | <5 years    | 9 (3-17)               | 0.15 (0.06-0.3)          |
| Central Europe             | Iodine deficiency           | 10-14 years | 146 (59-294)           | 2.4 (0.97-4.85)          |
| Central Europe             | Iodine deficiency           | 5-9 years   | 60 (24-125)            | 1.02 (0.41-2.11)         |
| Central Europe             | Protein-energy malnutrition | <5 years    | 3036 (2139-4147)       | 53.72 (37.84-73.37)      |
| Central Europe             | Protein-energy malnutrition | 10-14 years | 1179 (668-1885)        | 19.42 (11-31.06)         |
| Central Europe             | Protein-energy malnutrition | 5-9 years   | 1483 (847-2373)        | 25.07 (14.32-40.11)      |
| Central Europe             | Vitamin A deficiency        | <5 years    | 1070 (638-1679)        | 18.93 (11.28-29.7)       |
| Central Europe             | Vitamin A deficiency        | 10-14 years | 361 (201-612)          | 5.94 (3.31-10.08)        |
| Central Europe             | Vitamin A deficiency        | 5-9 years   | 692 (387-1139)         | 11.7 (6.53-19.26)        |
| Central Latin America      | Dietary iron deficiency     | <5 years    | 67981 (43507-101307)   | 313.91 (200.9-467.79)    |
| Central Latin America      | Dietary iron deficiency     | 10-14 years | 22506 (14039-35170)    | 102.15 (63.72-159.62)    |
| Central Latin America      | Dietary iron deficiency     | 5-9 years   | 53289 (33806-79175)    | 245.59 (155.8-364.89)    |
| Central Latin America      | Iodine deficiency           | <5 years    | 160 (74-291)           | 0.74 (0.34-1.35)         |
| Central Latin America      | Iodine deficiency           | 10-14 years | 2308 (1123-4186)       | 10.47 (5.1-19)           |
| Central Latin America      | Iodine deficiency           | 5-9 years   | 1068 (517-1950)        | 4.92 (2.38-8.99)         |
| Central Latin America      | Protein-energy malnutrition | <5 years    | 135494 (99480-179783)  | 625.66 (459.36-830.16)   |
| Central Latin America      | Protein-energy malnutrition | 10-14 years | 9834 (8070-12058)      | 44.63 (36.63-54.73)      |
| Central Latin America      | Protein-energy malnutrition | 5-9 years   | 13214 (10944-15911)    | 60.9 (50.44-73.33)       |
| Central Latin America      | Vitamin A deficiency        | <5 years    | 5559 (3515-8280)       | 25.67 (16.23-38.24)      |
| Central Latin America      | Vitamin A deficiency        | 10-14 years | 2120 (1221-3432)       | 9.62 (5.54-15.58)        |
| Central Latin America      | Vitamin A deficiency        | 5-9 years   | 4101 (2529-6246)       | 18.9 (11.66-28.79)       |
| Central Sub-Saharan Africa | Dietary iron deficiency     | <5 years    | 194340 (122226-288428) | 938.83 (590.45-1393.35)  |
| Central Sub-Saharan Africa | Dietary iron deficiency     | 10-14 years | 102117 (55670-164033)  | 602.41 (328.4-967.65)    |
| Central Sub-Saharan Africa | Dietary iron deficiency     | 5-9 years   | 199659 (119634-306269) | 1029.24 (616.71-1578.81) |
| Central Sub-Saharan Africa | Iodine deficiency           | <5 years    | 3260 (1547-5568)       | 15.75 (7.48-26.9)        |

|                            |                             |             |                        |                           |
|----------------------------|-----------------------------|-------------|------------------------|---------------------------|
| Central Sub-Saharan Africa | Iodine deficiency           | 10-14 years | 24117 (12009-44952)    | 142.27 (70.85-265.18)     |
| Central Sub-Saharan Africa | Iodine deficiency           | 5-9 years   | 14243 (7560-25363)     | 73.42 (38.97-130.74)      |
| Central Sub-Saharan Africa | Protein-energy malnutrition | <5 years    | 571118 (378023-837736) | 2758.97 (1826.16-4046.96) |
| Central Sub-Saharan Africa | Protein-energy malnutrition | 10-14 years | 11272 (7477-16828)     | 66.49 (44.11-99.27)       |
| Central Sub-Saharan Africa | Protein-energy malnutrition | 5-9 years   | 27185 (18051-40164)    | 140.14 (93.05-207.04)     |
| Central Sub-Saharan Africa | Vitamin A deficiency        | <5 years    | 46660 (29882-68609)    | 225.41 (144.35-331.44)    |
| Central Sub-Saharan Africa | Vitamin A deficiency        | 10-14 years | 15043 (8511-24164)     | 88.74 (50.21-142.55)      |
| Central Sub-Saharan Africa | Vitamin A deficiency        | 5-9 years   | 27663 (16024-43301)    | 142.6 (82.6-223.22)       |
| East Asia                  | Dietary iron deficiency     | <5 years    | 105723 (59605-167665)  | 125.65 (70.84-199.27)     |
| East Asia                  | Dietary iron deficiency     | 10-14 years | 40891 (21472-71156)    | 55.77 (29.29-97.05)       |
| East Asia                  | Dietary iron deficiency     | 5-9 years   | 59520 (30529-101227)   | 79.1 (40.57-134.52)       |
| East Asia                  | Iodine deficiency           | <5 years    | 171 (63-375)           | 0.2 (0.07-0.45)           |
| East Asia                  | Iodine deficiency           | 10-14 years | 2873 (1181-5859)       | 3.92 (1.61-7.99)          |
| East Asia                  | Iodine deficiency           | 5-9 years   | 995 (368-2190)         | 1.32 (0.49-2.91)          |
| East Asia                  | Protein-energy malnutrition | <5 years    | 62764 (50332-76097)    | 74.6 (59.82-90.44)        |
| East Asia                  | Protein-energy malnutrition | 10-14 years | 21990 (11995-36740)    | 29.99 (16.36-50.11)       |
| East Asia                  | Protein-energy malnutrition | 5-9 years   | 26014 (14526-43393)    | 34.57 (19.3-57.67)        |
| East Asia                  | Vitamin A deficiency        | <5 years    | 10606 (6639-15854)     | 12.61 (7.89-18.84)        |
| East Asia                  | Vitamin A deficiency        | 10-14 years | 3436 (1914-5649)       | 4.69 (2.61-7.7)           |
| East Asia                  | Vitamin A deficiency        | 5-9 years   | 5926 (3456-9363)       | 7.88 (4.59-12.44)         |
| Eastern Europe             | Dietary iron deficiency     | <5 years    | 18391 (9451-33192)     | 149.08 (76.61-269.06)     |
| Eastern Europe             | Dietary iron deficiency     | 10-14 years | 5124 (2334-10014)      | 43.94 (20.01-85.88)       |
| Eastern Europe             | Dietary iron deficiency     | 5-9 years   | 12431 (5465-24340)     | 95.17 (41.84-186.35)      |
| Eastern Europe             | Iodine deficiency           | <5 years    | 50 (24-86)             | 0.41 (0.19-0.69)          |
| Eastern Europe             | Iodine deficiency           | 10-14 years | 713 (359-1227)         | 6.12 (3.08-10.52)         |
| Eastern Europe             | Iodine deficiency           | 5-9 years   | 356 (175-600)          | 2.72 (1.34-4.59)          |

|                            |                             |             |                           |                          |
|----------------------------|-----------------------------|-------------|---------------------------|--------------------------|
| Eastern Europe             | Protein-energy malnutrition | <5 years    | 9567 (6501-13462)         | 77.55 (52.7-109.12)      |
| Eastern Europe             | Protein-energy malnutrition | 10-14 years | 2646 (1479-4256)          | 22.69 (12.69-36.5)       |
| Eastern Europe             | Protein-energy malnutrition | 5-9 years   | 4032 (2277-6514)          | 30.87 (17.43-49.87)      |
| Eastern Europe             | Vitamin A deficiency        | <5 years    | 77 (40-139)               | 0.62 (0.32-1.13)         |
| Eastern Europe             | Vitamin A deficiency        | 10-14 years | 16 (7-32)                 | 0.14 (0.06-0.28)         |
| Eastern Europe             | Vitamin A deficiency        | 5-9 years   | 41 (17-87)                | 0.32 (0.13-0.67)         |
| Eastern Sub-Saharan Africa | Dietary iron deficiency     | <5 years    | 700470 (464286-1018589)   | 1092.12 (723.88-1588.11) |
| Eastern Sub-Saharan Africa | Dietary iron deficiency     | 10-14 years | 330175 (217733-485352)    | 616.26 (406.39-905.9)    |
| Eastern Sub-Saharan Africa | Dietary iron deficiency     | 5-9 years   | 623103 (408575-922291)    | 1059.44 (694.68-1568.13) |
| Eastern Sub-Saharan Africa | Iodine deficiency           | <5 years    | 1549 (757-2778)           | 2.42 (1.18-4.33)         |
| Eastern Sub-Saharan Africa | Iodine deficiency           | 10-14 years | 16756 (9180-27854)        | 31.27 (17.13-51.99)      |
| Eastern Sub-Saharan Africa | Iodine deficiency           | 5-9 years   | 8750 (4390-15184)         | 14.88 (7.46-25.82)       |
| Eastern Sub-Saharan Africa | Protein-energy malnutrition | <5 years    | 2750984 (2088024-3602398) | 4289.13 (3255.5-5616.6)  |
| Eastern Sub-Saharan Africa | Protein-energy malnutrition | 10-14 years | 66621 (51856-82613)       | 124.35 (96.79-154.19)    |
| Eastern Sub-Saharan Africa | Protein-energy malnutrition | 5-9 years   | 157377 (121832-201603)    | 267.58 (207.15-342.78)   |
| Eastern Sub-Saharan Africa | Vitamin A deficiency        | <5 years    | 108236 (72084-155433)     | 168.75 (112.39-242.34)   |
| Eastern Sub-Saharan Africa | Vitamin A deficiency        | 10-14 years | 33751 (21963-49710)       | 63 (40.99-92.78)         |
| Eastern Sub-Saharan Africa | Vitamin A deficiency        | 5-9 years   | 61727 (40646-89664)       | 104.95 (69.11-152.45)    |
| High-income Asia Pacific   | Dietary iron deficiency     | <5 years    | 13026 (7063-22206)        | 178.76 (96.94-304.76)    |
| High-income Asia Pacific   | Dietary iron deficiency     | 10-14 years | 7702 (3154-15237)         | 95.06 (38.93-188.06)     |
| High-income Asia Pacific   | Dietary iron deficiency     | 5-9 years   | 11202 (4689-21947)        | 140.85 (58.96-275.95)    |
| High-income Asia Pacific   | Iodine deficiency           | <5 years    | 10 (4-21)                 | 0.13 (0.05-0.28)         |
| High-income Asia Pacific   | Iodine deficiency           | 10-14 years | 164 (63-342)              | 2.03 (0.78-4.23)         |
| High-income Asia Pacific   | Iodine deficiency           | 5-9 years   | 68 (26-142)               | 0.86 (0.33-1.78)         |
| High-income Asia Pacific   | Protein-energy malnutrition | <5 years    | 1087 (759-1462)           | 14.91 (10.41-20.06)      |
| High-income Asia Pacific   | Protein-energy malnutrition | 10-14 years | 1019 (560-1627)           | 12.57 (6.91-20.09)       |

|                              |                             |             |                        |                        |
|------------------------------|-----------------------------|-------------|------------------------|------------------------|
| High-income Asia Pacific     | Protein-energy malnutrition | 5-9 years   | 1150 (635-1919)        | 14.46 (7.99-24.13)     |
| High-income Asia Pacific     | Vitamin A deficiency        | <5 years    | 124 (62-234)           | 1.7 (0.84-3.21)        |
| High-income Asia Pacific     | Vitamin A deficiency        | 10-14 years | 57 (21-126)            | 0.7 (0.25-1.56)        |
| High-income Asia Pacific     | Vitamin A deficiency        | 5-9 years   | 100 (37-221)           | 1.25 (0.47-2.77)       |
| High-income North America    | Dietary iron deficiency     | <5 years    | 12402 (5859-23250)     | 59.1 (27.92-110.8)     |
| High-income North America    | Dietary iron deficiency     | 10-14 years | 12978 (5391-25210)     | 55.24 (22.95-107.3)    |
| High-income North America    | Dietary iron deficiency     | 5-9 years   | 20328 (8488-39682)     | 93.28 (38.95-182.09)   |
| High-income North America    | Iodine deficiency           | <5 years    | 25 (9-53)              | 0.12 (0.04-0.25)       |
| High-income North America    | Iodine deficiency           | 10-14 years | 426 (169-895)          | 1.81 (0.72-3.81)       |
| High-income North America    | Iodine deficiency           | 5-9 years   | 169 (66-349)           | 0.77 (0.3-1.6)         |
| High-income North America    | Protein-energy malnutrition | <5 years    | 1010 (911-1114)        | 4.81 (4.34-5.31)       |
| High-income North America    | Protein-energy malnutrition | 10-14 years | 4149 (2242-6891)       | 17.66 (9.54-29.33)     |
| High-income North America    | Protein-energy malnutrition | 5-9 years   | 4220 (2249-7013)       | 19.36 (10.32-32.18)    |
| High-income North America    | Vitamin A deficiency        | <5 years    | 126 (55-252)           | 0.6 (0.26-1.2)         |
| High-income North America    | Vitamin A deficiency        | 10-14 years | 59 (19-137)            | 0.25 (0.08-0.58)       |
| High-income North America    | Vitamin A deficiency        | 5-9 years   | 152 (55-336)           | 0.7 (0.25-1.54)        |
| North Africa and Middle East | Dietary iron deficiency     | <5 years    | 398060 (256392-587535) | 666.55 (429.32-983.82) |
| North Africa and Middle East | Dietary iron deficiency     | 10-14 years | 97533 (58676-149969)   | 172.32 (103.67-264.96) |
| North Africa and Middle East | Dietary iron deficiency     | 5-9 years   | 290779 (178465-457909) | 488.52 (299.83-769.31) |
| North Africa and Middle East | Iodine deficiency           | <5 years    | 1244 (693-2054)        | 2.08 (1.16-3.44)       |
| North Africa and Middle East | Iodine deficiency           | 10-14 years | 15545 (9022-24982)     | 27.46 (15.94-44.14)    |
| North Africa and Middle East | Iodine deficiency           | 5-9 years   | 7892 (4484-12837)      | 13.26 (7.53-21.57)     |
| North Africa and Middle East | Protein-energy malnutrition | <5 years    | 313337 (231803-440201) | 524.68 (388.15-737.11) |
| North Africa and Middle East | Protein-energy malnutrition | 10-14 years | 19703 (13970-27187)    | 34.81 (24.68-48.03)    |
| North Africa and Middle East | Protein-energy malnutrition | 5-9 years   | 26714 (19270-36554)    | 44.88 (32.37-61.41)    |
| North Africa and Middle East | Vitamin A deficiency        | <5 years    | 32313 (21320-46582)    | 54.11 (35.7-78)        |

|                              |                             |             |                           |                           |
|------------------------------|-----------------------------|-------------|---------------------------|---------------------------|
| North Africa and Middle East | Vitamin A deficiency        | 10-14 years | 6249 (3670-9564)          | 11.04 (6.48-16.9)         |
| North Africa and Middle East | Vitamin A deficiency        | 5-9 years   | 15340 (9587-23144)        | 25.77 (16.11-38.88)       |
| Oceania                      | Dietary iron deficiency     | <5 years    | 18012 (11156-27242)       | 973.26 (602.8-1471.95)    |
| Oceania                      | Dietary iron deficiency     | 10-14 years | 6318 (3184-11026)         | 451.67 (227.64-788.23)    |
| Oceania                      | Dietary iron deficiency     | 5-9 years   | 12946 (7498-20598)        | 819.16 (474.42-1303.33)   |
| Oceania                      | Iodine deficiency           | <5 years    | 1 (0-2)                   | 0.05 (0.02-0.11)          |
| Oceania                      | Iodine deficiency           | 10-14 years | 14 (5-28)                 | 0.98 (0.35-2.01)          |
| Oceania                      | Iodine deficiency           | 5-9 years   | 6 (2-14)                  | 0.41 (0.13-0.9)           |
| Oceania                      | Protein-energy malnutrition | <5 years    | 17517 (12765-24479)       | 946.5 (689.73-1322.68)    |
| Oceania                      | Protein-energy malnutrition | 10-14 years | 502 (338-790)             | 35.87 (24.16-56.45)       |
| Oceania                      | Protein-energy malnutrition | 5-9 years   | 758 (511-1096)            | 47.95 (32.32-69.32)       |
| Oceania                      | Vitamin A deficiency        | <5 years    | 1660 (969-2637)           | 89.72 (52.35-142.5)       |
| Oceania                      | Vitamin A deficiency        | 10-14 years | 430 (227-711)             | 30.71 (16.21-50.85)       |
| Oceania                      | Vitamin A deficiency        | 5-9 years   | 869 (483-1445)            | 54.98 (30.57-91.42)       |
| South Asia                   | Dietary iron deficiency     | <5 years    | 1969363 (1313599-2945059) | 1197.88 (799-1791.35)     |
| South Asia                   | Dietary iron deficiency     | 10-14 years | 1613308 (1040745-2324215) | 897.82 (579.19-1293.45)   |
| South Asia                   | Dietary iron deficiency     | 5-9 years   | 2463506 (1616120-3596874) | 1426.76 (935.99-2083.15)  |
| South Asia                   | Iodine deficiency           | <5 years    | 4759 (2477-8081)          | 2.89 (1.51-4.92)          |
| South Asia                   | Iodine deficiency           | 10-14 years | 82587 (47731-131764)      | 45.96 (26.56-73.33)       |
| South Asia                   | Iodine deficiency           | 5-9 years   | 31636 (16609-53806)       | 18.32 (9.62-31.16)        |
| South Asia                   | Protein-energy malnutrition | <5 years    | 2473534 (1949284-3170121) | 1504.54 (1185.66-1928.25) |
| South Asia                   | Protein-energy malnutrition | 10-14 years | 114373 (71788-169023)     | 63.65 (39.95-94.06)       |
| South Asia                   | Protein-energy malnutrition | 5-9 years   | 187252 (126929-257925)    | 108.45 (73.51-149.38)     |
| South Asia                   | Vitamin A deficiency        | <5 years    | 138030 (83727-211865)     | 83.96 (50.93-128.87)      |
| South Asia                   | Vitamin A deficiency        | 10-14 years | 55134 (31055-88317)       | 30.68 (17.28-49.15)       |
| South Asia                   | Vitamin A deficiency        | 5-9 years   | 81972 (47607-135165)      | 47.47 (27.57-78.28)       |



|                             |                             |             |                        |                        |
|-----------------------------|-----------------------------|-------------|------------------------|------------------------|
| Southeast Asia              | Dietary iron deficiency     | <5 years    | 232091 (147059-355886) | 425.97 (269.91-653.18) |
| Southeast Asia              | Dietary iron deficiency     | 10-14 years | 109670 (62200-170625)  | 190.64 (108.12-296.6)  |
| Southeast Asia              | Dietary iron deficiency     | 5-9 years   | 227869 (142248-351603) | 401.45 (250.61-619.44) |
| Southeast Asia              | Iodine deficiency           | <5 years    | 99 (40-194)            | 0.18 (0.07-0.36)       |
| Southeast Asia              | Iodine deficiency           | 10-14 years | 2147 (1081-3751)       | 3.73 (1.88-6.52)       |
| Southeast Asia              | Iodine deficiency           | 5-9 years   | 658 (271-1287)         | 1.16 (0.48-2.27)       |
| Southeast Asia              | Protein-energy malnutrition | <5 years    | 327709 (258602-404016) | 601.47 (474.63-741.52) |
| Southeast Asia              | Protein-energy malnutrition | 10-14 years | 25973 (18398-36179)    | 45.15 (31.98-62.89)    |
| Southeast Asia              | Protein-energy malnutrition | 5-9 years   | 42023 (32426-54316)    | 74.03 (57.13-95.69)    |
| Southeast Asia              | Vitamin A deficiency        | <5 years    | 27669 (17700-42302)    | 50.78 (32.49-77.64)    |
| Southeast Asia              | Vitamin A deficiency        | 10-14 years | 8684 (5236-13323)      | 15.09 (9.1-23.16)      |
| Southeast Asia              | Vitamin A deficiency        | 5-9 years   | 17610 (10699-26802)    | 31.02 (18.85-47.22)    |
| Southern Latin America      | Dietary iron deficiency     | <5 years    | 18964 (10863-32414)    | 390.66 (223.79-667.73) |
| Southern Latin America      | Dietary iron deficiency     | 10-14 years | 3388 (1223-7855)       | 68.68 (24.8-159.23)    |
| Southern Latin America      | Dietary iron deficiency     | 5-9 years   | 9568 (3583-19936)      | 186.93 (69.99-389.48)  |
| Southern Latin America      | Iodine deficiency           | <5 years    | 5 (2-11)               | 0.1 (0.03-0.22)        |
| Southern Latin America      | Iodine deficiency           | 10-14 years | 73 (28-148)            | 1.48 (0.57-3.01)       |
| Southern Latin America      | Iodine deficiency           | 5-9 years   | 33 (12-68)             | 0.64 (0.24-1.33)       |
| Southern Latin America      | Protein-energy malnutrition | <5 years    | 5449 (4163-7026)       | 112.25 (85.75-144.74)  |
| Southern Latin America      | Protein-energy malnutrition | 10-14 years | 683 (470-981)          | 13.84 (9.54-19.89)     |
| Southern Latin America      | Protein-energy malnutrition | 5-9 years   | 839 (588-1168)         | 16.4 (11.48-22.83)     |
| Southern Latin America      | Vitamin A deficiency        | <5 years    | 1323 (687-2439)        | 27.25 (14.14-50.25)    |
| Southern Latin America      | Vitamin A deficiency        | 10-14 years | 180 (48-494)           | 3.66 (0.98-10.01)      |
| Southern Latin America      | Vitamin A deficiency        | 5-9 years   | 631 (213-1387)         | 12.33 (4.17-27.09)     |
| Southern Sub-Saharan Africa | Dietary iron deficiency     | <5 years    | 35712 (22005-54712)    | 441.09 (271.79-675.76) |
| Southern Sub-Saharan Africa | Dietary iron deficiency     | 10-14 years | 27587 (14953-43742)    | 367.15 (199.01-582.16) |

|                             |                             |             |                        |                           |
|-----------------------------|-----------------------------|-------------|------------------------|---------------------------|
| Southern Sub-Saharan Africa | Dietary iron deficiency     | 5-9 years   | 43336 (25431-68074)    | 541.42 (317.72-850.48)    |
| Southern Sub-Saharan Africa | Iodine deficiency           | <5 years    | 42 (17-88)             | 0.52 (0.21-1.09)          |
| Southern Sub-Saharan Africa | Iodine deficiency           | 10-14 years | 600 (249-1220)         | 7.98 (3.31-16.24)         |
| Southern Sub-Saharan Africa | Iodine deficiency           | 5-9 years   | 269 (112-566)          | 3.37 (1.4-7.07)           |
| Southern Sub-Saharan Africa | Protein-energy malnutrition | <5 years    | 289582 (207513-386760) | 3576.69 (2563.05-4776.97) |
| Southern Sub-Saharan Africa | Protein-energy malnutrition | 10-14 years | 3846 (2625-5334)       | 51.19 (34.94-70.99)       |
| Southern Sub-Saharan Africa | Protein-energy malnutrition | 5-9 years   | 13843 (9993-18157)     | 172.94 (124.84-226.85)    |
| Southern Sub-Saharan Africa | Vitamin A deficiency        | <5 years    | 4835 (3015-7480)       | 59.72 (37.24-92.38)       |
| Southern Sub-Saharan Africa | Vitamin A deficiency        | 10-14 years | 1936 (1155-2969)       | 25.77 (15.37-39.52)       |
| Southern Sub-Saharan Africa | Vitamin A deficiency        | 5-9 years   | 3668 (2258-5682)       | 45.82 (28.21-70.99)       |
| Tropical Latin America      | Dietary iron deficiency     | <5 years    | 75584 (43782-124469)   | 468.52 (271.39-771.54)    |
| Tropical Latin America      | Dietary iron deficiency     | 10-14 years | 37359 (15462-69576)    | 220.07 (91.08-409.85)     |
| Tropical Latin America      | Dietary iron deficiency     | 5-9 years   | 69277 (34469-123491)   | 417.22 (207.59-743.73)    |
| Tropical Latin America      | Iodine deficiency           | <5 years    | 9 (3-19)               | 0.06 (0.02-0.12)          |
| Tropical Latin America      | Iodine deficiency           | 10-14 years | 143 (55-305)           | 0.84 (0.33-1.8)           |
| Tropical Latin America      | Iodine deficiency           | 5-9 years   | 60 (22-127)            | 0.36 (0.13-0.76)          |
| Tropical Latin America      | Protein-energy malnutrition | <5 years    | 88998 (70561-110539)   | 551.67 (437.38-685.19)    |
| Tropical Latin America      | Protein-energy malnutrition | 10-14 years | 4343 (3483-5498)       | 25.58 (20.52-32.39)       |
| Tropical Latin America      | Protein-energy malnutrition | 5-9 years   | 5178 (4110-6531)       | 31.19 (24.76-39.34)       |
| Tropical Latin America      | Vitamin A deficiency        | <5 years    | 5695 (3372-9144)       | 35.3 (20.9-56.68)         |
| Tropical Latin America      | Vitamin A deficiency        | 10-14 years | 3108 (1600-5346)       | 18.31 (9.42-31.49)        |
| Tropical Latin America      | Vitamin A deficiency        | 5-9 years   | 5396 (2767-9518)       | 32.5 (16.67-57.32)        |
| Western Europe              | Dietary iron deficiency     | <5 years    | 23496 (14105-37451)    | 106.81 (64.12-170.25)     |
| Western Europe              | Dietary iron deficiency     | 10-14 years | 6372 (3302-11227)      | 26.98 (13.98-47.53)       |
| Western Europe              | Dietary iron deficiency     | 5-9 years   | 22277 (12131-37777)    | 96 (52.28-162.79)         |
| Western Europe              | Iodine deficiency           | <5 years    | 58 (22-123)            | 0.26 (0.1-0.56)           |

---

|                            |                             |             |                           |                           |
|----------------------------|-----------------------------|-------------|---------------------------|---------------------------|
| Western Europe             | Iodine deficiency           | 10-14 years | 1079 (427-2194)           | 4.57 (1.81-9.29)          |
| Western Europe             | Iodine deficiency           | 5-9 years   | 405 (156-856)             | 1.75 (0.67-3.69)          |
| Western Europe             | Protein-energy malnutrition | <5 years    | 595 (485-723)             | 2.7 (2.2-3.29)            |
| Western Europe             | Protein-energy malnutrition | 10-14 years | 9871 (5618-15993)         | 41.79 (23.79-67.72)       |
| Western Europe             | Protein-energy malnutrition | 5-9 years   | 10681 (5781-17211)        | 46.03 (24.91-74.17)       |
| Western Europe             | Vitamin A deficiency        | <5 years    | 343 (192-557)             | 1.56 (0.87-2.53)          |
| Western Europe             | Vitamin A deficiency        | 10-14 years | 51 (23-96)                | 0.21 (0.1-0.41)           |
| Western Europe             | Vitamin A deficiency        | 5-9 years   | 279 (142-509)             | 1.2 (0.61-2.19)           |
| Western Sub-Saharan Africa | Dietary iron deficiency     | <5 years    | 1139710 (742425-1645060)  | 1567 (1020.77-2261.81)    |
| Western Sub-Saharan Africa | Dietary iron deficiency     | 10-14 years | 523811 (319794-793211)    | 882.15 (538.56-1335.85)   |
| Western Sub-Saharan Africa | Dietary iron deficiency     | 5-9 years   | 1184334 (781181-1749036)  | 1788.48 (1179.68-2641.25) |
| Western Sub-Saharan Africa | Iodine deficiency           | <5 years    | 567 (261-1057)            | 0.78 (0.36-1.45)          |
| Western Sub-Saharan Africa | Iodine deficiency           | 10-14 years | 7162 (3590-12844)         | 12.06 (6.05-21.63)        |
| Western Sub-Saharan Africa | Iodine deficiency           | 5-9 years   | 3497 (1611-6398)          | 5.28 (2.43-9.66)          |
| Western Sub-Saharan Africa | Protein-energy malnutrition | <5 years    | 2744455 (2010115-3648427) | 3773.39 (2763.73-5016.27) |
| Western Sub-Saharan Africa | Protein-energy malnutrition | 10-14 years | 31190 (22369-41879)       | 52.53 (37.67-70.53)       |
| Western Sub-Saharan Africa | Protein-energy malnutrition | 5-9 years   | 83665 (58663-115587)      | 126.34 (88.59-174.55)     |
| Western Sub-Saharan Africa | Vitamin A deficiency        | <5 years    | 114156 (78333-162171)     | 156.95 (107.7-222.97)     |
| Western Sub-Saharan Africa | Vitamin A deficiency        | 10-14 years | 42228 (27629-60286)       | 71.12 (46.53-101.53)      |
| Western Sub-Saharan Africa | Vitamin A deficiency        | 5-9 years   | 80154 (53004-113886)      | 121.04 (80.04-171.98)     |

---
